# Supplementary material for: Pan-cancer investigation reveals mechanistic insights of planar cell polarity gene Fuz in carcinogenesis
Source: Aging (Albany NY). 2021 Feb 26;13(5):7259–83. doi: 10.18632/aging.202582 (PMC7993721; doi:10.18632/aging.202582)
Supplement: Supplementary File 1 [file aging-13-202582-s003.xlsx]

## Sheet: HNSC gene rank
Supplementary File 1. The gene ranks used for GSEA analysis.
Gene_symbol	log2FC (Low Fuz/High Fuz)	adjusted p value
FABP4	2.23968	7.29e-11
AC018467.1	2.22213	6.21e-05
MTND1P23	1.82824	1.72e-10
KRT2	1.74974	1.61e-05
UPK1A	1.59257	4.55e-06
FLG2	1.54524	0.00061979
CSF2	1.50035	1.31e-08
PPBP	1.49708	6.5e-07
TRIML2	1.4863	6.06e-05
FMO6P	1.42695	0.000419289
BCRP4	1.4032	0.000398096
KRT84	1.32466	0.000578492
KRT8P26	1.29622	1.86e-05
HMGB3P8	1.287	0.000386296
TRIML1	1.28326	0.000107841
KRT37	1.27317	6.43e-05
HRNR	1.25773	1.86e-06
PCDHGC5	1.25516	3.06e-06
KRT8P21	1.24594	0.000483154
AC245452.1	1.19383	0.000570627
AC010735.1	1.1405	4.76e-05
SH2D5	1.13689	5.27e-07
CSF3	1.09528	0.000197929
AL596223.1	1.08877	0.000245867
C20orf197	1.08869	0.000162849
AC011483.1	1.07812	5.57e-05
AP000925.1	1.0727	5.69e-06
SH3TC2-DT	1.06734	9.54e-06
SOST	1.06065	0.000925994
IL33	1.05778	1.84e-05
LINC01470	1.0563	0.0001567
DSCAM	1.04896	0.000592945
DHRS2	1.01575	0.000360374
PCNPP3	1.01447	0.000158876
MTCO1P53	1.01045	2.8e-05
AC113346.1	1.00277	7.93e-05
AL031985.2	0.969649	8.88e-07
GJB2	0.955939	4.34e-06
MIR3945HG	0.945285	0.000112818
AC008897.2	0.941401	0.000308716
LINC01088	0.93907	0.000137057
OR7E108P	0.93226	0.000780139
GJB6	0.931335	4.92e-05
ADAM21	0.929141	1.35e-05
NIPAL4	0.928752	9.5e-06
AL121657.1	0.92265	0.000745351
LINC00589	0.918124	1.39e-05
FABP5P11	0.912047	4.21e-05
KRT8P10	0.902297	0.000803864
AC002066.1	0.901358	4.32e-05
MAP2	0.891169	1.54e-05
KHSRPP1	0.875076	5.32e-05
FABP5P2	0.868267	0.000104496
AC010735.2	0.868073	0.000193347
FABP5P1	0.863252	7.63e-05
IL1B	0.845706	4.84e-05
KRT6B	0.844327	0.000510354
CASP1P2	0.843815	3.18e-05
SH3TC2	0.842021	3.4e-07
AC078820.2	0.837686	0.000335405
KRT8P9	0.833095	0.000509932
WARS1	0.829741	2.11e-05
RN7SL3	0.826677	0.000130579
KLF7-IT1	0.823898	2.21e-07
SLPI	0.817938	0.000222689
MT2P1	0.811959	8.19e-05
AL157871.2	0.81112	0.000751501
RN7SKP296	0.799536	6.38e-05
FABP5P10	0.792389	0.000570627
FAM83A-AS1	0.791261	0.000525224
AC087343.1	0.786178	7.63e-06
FABP5P3	0.781125	0.000153645
OR5BA1P	0.768905	0.000334403
KRT8P13	0.762429	0.000214372
THBD	0.759963	5.64e-06
CARD17	0.758596	0.000601584
GOLGA7B	0.757149	0.000253359
NKX2-8	0.754384	0.000861382
PLK2	0.743388	2.35e-08
CYP27B1	0.735667	2.95e-05
AL592114.1	0.729104	3.43e-05
AC024270.1	0.728307	0.000387753
MT2A	0.724741	0.000335551
KRT17P2	0.722779	0.000161928
AC104046.1	0.720923	7.55e-05
RPL21P120	0.716335	1.57e-05
PPP4R4	0.70996	0.000794319
RPL21P93	0.70715	0.000109619
HTR7	0.703479	0.000919361
RBM44	0.693542	1.16e-05
DSC2	0.691904	0.000107841
PTGR1	0.691681	2.48e-05
SH3PXD2A-AS1	0.691206	0.000109898
SFN	0.687197	4.07e-05
RCL1	0.685903	1.95e-12
KRT6A	0.680432	0.000120535
RIC1	0.675964	3.69e-10
NEDD8-MDP1	0.675452	2.11e-05
LURAP1L	0.670221	0.000191624
SLC2A9	0.668425	1.46e-07
MSMO1	0.667294	3.55e-08
TMEM154	0.665604	1.13e-05
AC090013.1	0.661432	0.000276084
EMSLR	0.659888	1.86e-05
LINC02328	0.658201	0.000264098
KRT17	0.656378	0.000716209
XDH	0.651084	0.00053197
RANBP6	0.650908	3.43e-10
RPL22L1	0.646156	3.15e-06
KIAA2026	0.643552	1.36e-09
RGS20	0.641191	0.000993646
NPM1P6	0.635283	3.77e-10
CHST2	0.634847	0.000795212
SLC28A3	0.628553	0.000703279
ADRB2	0.623971	0.000643657
MLANA	0.622915	0.000374192
LINC00958	0.622816	0.000123122
PLGRKT	0.620298	4.2e-08
LDHA	0.61852	4.26e-11
EPPK1	0.61756	0.000744514
TUBB2A	0.614531	0.000259711
KRT5	0.613337	3.23e-06
AK3	0.610976	5.79e-10
MAP3K20-AS1	0.610859	0.000219421
TCAF2	0.610241	1.94e-06
S100A2	0.609407	0.000491545
AC107032.1	0.609384	0.000108865
LPAR3	0.609275	2.96e-05
AC107398.2	0.607486	0.0002736
ZDHHC21	0.60593	1.72e-05
STC2	0.603126	0.000653185
SERPINB5	0.596479	3.63e-05
FHDC1	0.591801	2.66e-06
AC005224.3	0.59103	6.26e-05
LDHAP5	0.590626	3.4e-05
NPM1P32	0.587016	0.000931279
CDK6	0.584346	3.35e-05
IL1RAP	0.581631	1.83e-06
DDX60	0.580957	0.0005408
SAMD9	0.580534	0.000784728
LGALSL	0.580394	0.000646835
JHY	0.580332	0.000270763
ANXA3	0.579973	0.000326643
CLCA2	0.578927	0.000943729
HMGCR	0.577291	5.5e-09
BCL2L2-PABPN1	0.571761	4.76e-05
SRXN1	0.570958	0.000459226
MYO1B	0.570911	3.66e-06
TRIM36	0.569717	5.94e-05
MTCO2P12	0.563778	0.000114342
HERC3	0.563419	6.53e-07
HBEGF	0.562943	0.000434434
RAB38	0.559603	0.000469666
SQLE	0.556857	6.31e-07
GRPEL2	0.556625	2.78e-08
FAM169A	0.556557	0.000345586
CTSC	0.552337	6.08e-06
KANK1	0.548221	0.00017232
MIR4713HG	0.545034	0.000160853
NACA3P	0.543689	0.000359462
NIPAL1	0.543256	0.000172936
ARHGEF37	0.538666	0.000196287
CASP4	0.538195	6.97e-06
ELL2	0.537793	1.45e-06
G6PD	0.53648	0.000194092
LIMA1	0.534651	1.32e-07
GM2A	0.534521	3.41e-07
CDH3	0.534012	0.000119693
LDHAP4	0.533834	0.000222928
PKP3	0.533018	4.31e-05
LDLR	0.532746	2.67e-06
SERPINB1	0.531545	0.000698916
UHRF2	0.531088	4.64e-08
JAK2	0.530262	9.82e-05
AC078819.1	0.528323	3.74e-05
PPIF	0.526738	2.84e-05
TRIB3	0.526435	0.000220378
ELOVL7	0.525772	0.000432115
NPM1P39	0.523482	8.86e-06
BNIP3P11	0.523082	0.000386053
TMCC3	0.520237	3.31e-05
CASP1	0.519173	2.92e-05
POLR3G	0.518587	5.56e-05
TXN	0.518366	4.2e-05
PRELID1P1	0.518251	1.11e-05
NAMPT	0.517914	0.00017286
IFFO2	0.517564	0.00093589
KLF7	0.517307	3.73e-06
HMGB3P24	0.515335	0.000254774
MPZL2	0.515161	9.26e-05
PUM3	0.514598	2.32e-07
BTBD11	0.511223	0.000464333
CYP51A1	0.510238	0.000244327
SLC22A15	0.51007	8.19e-05
AC025857.2	0.508594	0.000159308
AC016734.1	0.508537	6.32e-05
TNFRSF10A-AS1	0.507725	6.9e-07
TLR2	0.50617	0.00030735
FJX1	0.506001	0.000103689
RPL21P119	0.499901	0.000505738
CSNK1A1	0.499227	3.78e-08
PYGL	0.498214	0.000685416
BNIP3	0.496869	0.000372853
RRAS2	0.496146	5.78e-07
SOX9	0.495834	0.000708009
DUSP6	0.495488	0.000469795
UGCG	0.495315	1.3e-06
AC079465.1	0.495213	0.000110361
MEAK7	0.493264	1.95e-05
DHRS1	0.492321	0.000380344
STARD4	0.488006	6.73e-06
HRAS	0.487318	4.08e-05
FBLIM1	0.486194	0.000130635
MVD	0.485056	0.000163104
RPL21P16	0.483441	0.000389858
DCBLD1	0.482186	0.000371355
SPRYD7	0.48072	3.11e-10
PHLDA1	0.480078	0.000221845
FAM214B	0.479503	9.23e-05
PLPP6	0.478601	1.18e-06
GLIPR1	0.478296	0.000914389
HSPH1	0.474846	3.86e-06
CDCP1	0.474519	9.27e-06
AC021078.1	0.473577	3.4e-05
CAV2	0.471932	2.59e-05
CRYBG1	0.470654	4.96e-05
NPM1P27	0.468798	8.85e-06
RPL7AP50	0.467981	0.000623506
SP110	0.464562	0.000352014
TSC22D2	0.463335	4.98e-05
EIF4A1P10	0.46215	0.00032349
TRIM21	0.461839	4.61e-05
CDC25B	0.460596	2.46e-05
ERRFI1	0.459592	0.000287312
SH2D3A	0.45945	4.73e-06
AC091492.1	0.457746	4.64e-05
FAM3C2	0.456852	5.13e-05
AL662899.4	0.455328	6.57e-05
AC008736.1	0.455308	0.000577196
NPM1	0.454082	1.08e-10
PLD2	0.453415	3.18e-05
AL136295.5	0.453214	0.000262951
SKA2P1	0.450527	0.0002736
SOWAHC	0.448897	7.45e-05
NOCT	0.448461	0.000709255
POP1	0.447458	1.3e-07
TGFA	0.447181	0.000900689
WWC1	0.447125	1.11e-05
GPR157	0.446034	0.000676816
CAB39	0.444648	7.05e-07
TUT7	0.4439	1.63e-06
PRNP	0.442104	0.000128076
NOP16	0.442092	1.74e-06
CD44	0.441188	6.63e-06
FLNB	0.440829	1.96e-05
ACER3	0.439322	2.83e-05
TANC2	0.439295	5.09e-05
IL17RE	0.439202	0.000218571
ANXA2P2	0.43616	1.06e-05
VDAC1	0.435898	9.47e-14
CNDP2	0.431885	8.67e-06
YWHAZP2	0.431458	0.000946271
DUSP7	0.431245	2.86e-05
FDPS	0.4305	4.39e-07
VDAC1P1	0.430245	0.00078183
GNAI1	0.430031	1.88e-05
FBXO45	0.429053	2.19e-06
SHB	0.426758	0.000182022
FSCN1	0.426386	0.000215469
SLC7A1	0.42634	0.000573777
NDUFAF2P1	0.425344	9.9e-05
TUBB6	0.425234	0.000357865
TRAF3IP2	0.425123	1.54e-08
PTPN12	0.423315	5.62e-08
NDUFAF2	0.42252	4.7e-06
YWHAZP6	0.422012	0.000643657
PRELID1	0.421063	3.88e-07
TRIM5	0.421046	2.7e-05
PNP	0.418166	0.000163875
TFAP2A	0.417363	1.92e-05
CLTA	0.416388	5.63e-05
BAK1	0.416229	5.97e-05
TAF9	0.414452	9.44e-11
MCC	0.413838	1.7e-05
AP1S1	0.412484	5.49e-07
TUBA1C	0.410111	4.69e-06
FMNL2	0.408766	5.45e-05
TKT	0.407379	9.41e-05
GNA15	0.407073	0.00023203
AC091825.3	0.405146	4.84e-05
MTHFD1L	0.405034	3.1e-05
CDC37L1	0.404691	9.87e-06
TBC1D2	0.404118	4.83e-05
PYGB	0.402917	0.00035492
FAM83H	0.402699	3.57e-05
EIF5A2	0.401573	0.000502549
USP43	0.401184	0.000307514
FAM3C	0.399675	2.05e-05
RPS6	0.398865	0.000217944
PLEKHG5	0.395333	0.000187275
TRIM14	0.395239	7.1e-05
AL031587.5	0.395009	0.000178063
RNF141	0.394906	5.03e-06
RRAGA	0.393228	1.35e-06
SERPINB8	0.393134	0.000448446
TES	0.393024	3.25e-06
TCOF1	0.392994	5.52e-07
LYAR	0.392611	8.96e-06
FOXN2	0.391757	4.22e-05
BACH1	0.391616	9.86e-05
FBXL2	0.391174	0.000454484
EIF4EP2	0.391079	0.000557913
AL049840.5	0.390948	6.87e-05
RARS1	0.390655	3.68e-11
RB1	0.39028	3.71e-05
DGKH	0.389682	0.000122987
HMOX2	0.389371	7.61e-05
POMP	0.38897	2.06e-06
PRMT3	0.388916	1.12e-06
CDK7	0.388694	1.68e-07
PFKP	0.388427	2.32e-05
TMEM131L	0.387921	1.01e-06
MLKL	0.387466	7.66e-05
AC099850.4	0.386368	0.000963373
ZHX1	0.386095	8.08e-06
RAB3D	0.385347	0.000445357
TNFRSF10A	0.381795	0.000179122
NACA4P	0.381635	0.000478766
ATOX1	0.381575	0.000695271
SLC25A22	0.381094	4.43e-05
MYC	0.379069	0.000419641
TOLLIP	0.378404	1.31e-05
JAG1	0.377604	0.000838334
RPL21	0.377062	0.000863142
SNAI2	0.37669	0.000869121
SREK1IP1	0.375245	3.27e-06
POLR1E	0.374902	4.55e-05
LRRC8A	0.374579	0.000400232
LARP1	0.373997	2.14e-09
UBE2E2	0.370975	6.12e-05
WDFY2	0.370339	1.27e-05
GPRIN1	0.370142	0.000582617
TDRD7	0.369514	9.32e-05
NSA2	0.367448	1.76e-08
ORMDL2	0.367389	6.04e-06
MALT1	0.367372	2.72e-06
UBE2F	0.36736	5.13e-05
DAB2IP	0.367287	7.1e-05
CNOT6	0.36649	8e-08
PA2G4	0.366308	1.08e-08
SP140L	0.365514	0.000168977
GTF2F2	0.364733	2.77e-07
HSPA4	0.364225	1.57e-09
BAIAP2	0.363503	0.000309276
HAUS6	0.36255	0.00050007
MBD1	0.362087	1.39e-05
MAST4	0.361891	0.000860781
SCAMP1	0.361271	7.54e-07
PGAM1	0.361201	2.11e-05
PUS7	0.361191	4.88e-05
HNRNPA1P10	0.360905	0.000954604
CCNYL1	0.360892	0.000319107
LIG4	0.36057	0.000456428
NECTIN1	0.360387	0.000723606
PML	0.359006	0.000697042
VDR	0.358494	0.00076108
GLO1	0.358011	5.26e-06
DIAPH3	0.357854	0.00059617
FRMD4B	0.357592	0.000182809
EIF3M	0.356836	2.06e-06
SLC25A13	0.356447	1.18e-06
AP3S1	0.355946	1.88e-06
HOMER1	0.355841	0.000369653
NAA20	0.355731	4.68e-05
CCNB1	0.355155	0.000528777
ARPC1A	0.355035	3.75e-06
BTF3	0.352557	7.9e-08
HIGD1A	0.351825	0.00076453
CKAP2	0.351823	2.84e-05
CAP1	0.351589	5.94e-06
TIGAR	0.351514	2.27e-05
ANKHD1-EIF4EBP3	0.351104	0.000232513
BLZF1	0.351056	9.61e-06
YWHAZ	0.348105	7.36e-05
DDX21	0.347757	0.000220419
RACK1	0.347676	1.16e-05
VCP	0.347657	5.94e-05
SARS1	0.347403	1.88e-07
ANXA2	0.346451	9.43e-05
SKA3	0.346069	0.000566679
IL4R	0.343823	0.000952719
PHAX	0.342977	3.47e-12
UBAP1	0.342928	0.000234486
ETF1	0.342678	5.67e-11
CLIP1	0.342198	0.000745762
KDM4C	0.340575	6.64e-05
PGK1	0.340138	1.62e-05
PDCD6IP	0.33988	3.16e-06
ENO1	0.339829	1.06e-05
RPS13	0.33883	0.000267854
SNX24	0.338566	2.47e-06
NOL6	0.33856	0.000458255
KLHL18	0.338059	1.56e-05
NIBAN2	0.335409	0.000667651
GNAI3	0.334962	2.69e-07
NCAPG	0.333022	0.000606929
ATP1A1	0.332911	4.6e-05
LRRC59	0.332571	4.97e-07
OSTM1	0.332231	8.3e-05
UBLCP1	0.332209	2.53e-08
DHX29	0.332089	6.26e-08
ARPC5L	0.331931	0.000364766
SLC25A15	0.331908	0.000175861
RABGGTA	0.331725	0.000414677
AC006486.2	0.331383	0.000550157
IPO7	0.331178	2.84e-05
WDR36	0.331026	5.67e-07
VANGL1	0.330275	0.000216097
ADK	0.329866	9.41e-05
ZNF277	0.329625	4.84e-07
DESI1	0.329607	5.06e-07
RPL12	0.329536	0.00073356
COPB1	0.329514	4.87e-07
APLP2	0.329157	0.000191026
RPS14	0.329015	0.000889255
DCAF10	0.328478	2.73e-05
SLC35D1	0.328232	0.000162803
TAF13	0.327557	0.000288365
NUDT15	0.327399	2.23e-05
KIF16B	0.327101	0.000889978
CCDC86	0.326901	0.000214646
ESD	0.326103	1.07e-06
TTC37	0.325545	1.61e-05
WASL	0.325537	6.65e-06
CAST	0.324734	3.89e-05
AP3B1	0.324498	1.59e-07
KCTD9	0.324169	0.000138369
DIAPH1	0.324123	1.67e-05
S100A11	0.323887	0.000708461
EAF1	0.323448	4.02e-05
AATF	0.323257	5e-07
RAD50	0.32279	1.19e-06
SLC25A30	0.322236	0.000223831
RPL19	0.322037	0.00026261
SNAPC3	0.321855	0.000125029
TNFAIP1	0.321518	2.58e-06
SLC25A51	0.321048	0.000237114
PPA1	0.320343	1.15e-05
GRPEL1	0.319616	5.01e-05
AC135050.1	0.318589	0.000587965
HARS1	0.318351	7.25e-09
LRRFIP1	0.31802	4.2e-05
YTHDC2	0.317999	3.48e-05
GATD1	0.316732	0.000440979
AC026410.3	0.316361	0.000147511
CTPS1	0.314676	1.31e-05
MOB3A	0.314252	7.22e-05
RIC8A	0.313647	2.17e-06
RAP1GDS1	0.313436	6.88e-06
GARS1	0.313132	1.24e-05
SEPTIN8	0.312519	6.64e-05
SHC1	0.311516	0.000432967
SLK	0.311302	0.000504047
EIF2B2	0.310786	8.34e-05
RASA1	0.310577	0.000602039
PHRF1	0.309847	1.66e-06
PSMA1	0.309493	1.13e-05
DCTN4	0.3094	3.45e-06
MPHOSPH6	0.309314	0.000500552
SRPK1	0.30898	5.35e-06
NET1	0.308426	0.000821971
ACTG1	0.308227	4.62e-06
TMBIM1	0.308211	0.000739814
UBQLN2	0.307914	0.000252447
CARNMT1	0.307394	2.35e-05
SYPL1	0.306808	3.24e-05
RPS23	0.306383	0.000210642
EXOSC3	0.305562	0.000861442
REXO2	0.305509	0.000661828
SUGT1	0.304818	1.42e-05
GTF2H1	0.304582	5.74e-08
GNPNAT1	0.304557	0.000390325
CKAP4	0.304026	4.4e-05
RALB	0.303796	0.000344612
NUP58	0.303274	9.11e-06
PAICS	0.302209	4.83e-05
USP40	0.302139	0.000128176
NCL	0.302105	1.94e-07
DSTN	0.301608	5.06e-05
EIF2S3	0.301401	3.02e-06
EIF4H	0.300448	5.35e-08
NPEPPS	0.300394	0.000311206
TBCA	0.299842	8.01e-05
RAB10	0.299329	0.000868285
ODF2L	0.297826	0.000867949
MRRF	0.297724	2e-05
ASCC3	0.297707	0.000528846
RPL17	0.297625	0.000585374
POLR1D	0.29707	2.1e-05
TWF1	0.296631	0.000824164
TMEM33	0.296241	7.25e-05
PLAA	0.295906	0.000271135
BAIAP2L1	0.295793	0.000327457
RTCA	0.295494	2.51e-07
FEM1C	0.294983	0.000234486
FARSB	0.294652	2.01e-05
LTBR	0.294578	8.84e-05
PRDM4	0.294453	4.74e-07
SFXN1	0.294355	2.51e-05
LTA4H	0.294307	0.00017319
DDX41	0.294152	2.5e-06
CAPZA1	0.29307	4.17e-05
GRHPR	0.292446	0.00064222
ANO10	0.292054	0.000238117
TOP1	0.291975	0.000190367
HINT1	0.291743	0.000213569
YWHAQ	0.291113	4.42e-05
PKM	0.290967	0.000601911
CTR9	0.290739	9.7e-06
VPS36	0.290154	7.75e-05
ARHGDIA	0.289648	4.61e-06
TRMT10A	0.289092	0.00014498
MED1	0.288919	0.000440816
MTFR1	0.288468	0.00026046
YWHAG	0.288439	3.44e-05
CD3EAP	0.288413	0.000466442
AGFG1	0.288311	6.08e-05
ARPC2	0.28736	2.34e-05
SAAL1	0.287238	0.000243751
DNAJC2	0.287195	0.000278554
SBDS	0.286806	8.79e-05
UFM1	0.285848	8.95e-06
DTD1	0.2857	0.000386416
ORC5	0.285378	1.66e-05
CCNG1	0.284871	0.000865001
USP15	0.283203	5.85e-05
EIF4E	0.282617	1.24e-05
EI24	0.282273	9.79e-05
FAF2	0.282122	2.96e-07
CDK12	0.281925	0.000240331
STIM1	0.281868	0.000301462
WDR55	0.281752	3.33e-08
EIF4A3	0.281189	8.99e-05
YARS1	0.281004	7.01e-07
TNPO1	0.28013	1.42e-05
BNIP1	0.279813	0.000283183
RRS1	0.279583	0.000706399
APEH	0.279559	0.000157054
UEVLD	0.278578	1.54e-05
RPL4	0.278182	0.000623506
SLC31A1	0.277913	0.000357398
RPL6	0.276846	0.000173162
ZPR1	0.276624	0.000104669
ACLY	0.276385	0.000209881
PTBP3	0.276171	0.000234538
TCERG1	0.276125	5.19e-06
GEMIN5	0.275189	7.04e-05
BCAP29	0.274269	0.000118708
ZCCHC7	0.274236	0.000399363
CORO1C	0.274172	0.000204754
VARS1	0.273754	0.000446856
GLMN	0.273367	0.000386622
PPP2CA	0.273272	1.77e-06
NMD3	0.27242	2.43e-05
VDAC2	0.271764	3.16e-05
EIF2S1	0.271655	0.000200205
TEX10	0.271091	1.97e-05
SNX5	0.271063	1.76e-06
SNX3	0.270905	5.72e-06
EIF3A	0.270629	0.000251152
RNF149	0.27047	0.000379845
WASHC4	0.269974	0.00029008
RUFY2	0.269433	1.09e-05
NAT10	0.26928	0.000400332
ERP44	0.267897	2.59e-05
C9orf85	0.267618	0.000269757
UTP15	0.267138	1.48e-06
PCYT1A	0.265694	0.000494643
DNTTIP2	0.265535	6.08e-07
NOLC1	0.265282	9.66e-05
USP47	0.264372	3.02e-05
SERBP1	0.264314	1.38e-06
TARS1	0.264301	0.00023203
UIMC1	0.263965	1.04e-06
NHP2	0.263929	0.000464867
ATG12	0.263751	7.28e-07
CCT4	0.263592	3.08e-05
STX6	0.263562	2.48e-06
ANP32B	0.26308	0.000675618
FAM114A2	0.262973	4.24e-05
CDK8	0.262868	1.27e-05
EIF4BP7	0.26275	0.000695271
PWP1	0.262462	4.03e-07
NOP14	0.262415	2.49e-05
WBP4	0.262396	2.92e-05
RIOK2	0.262063	5.64e-07
TTC1	0.261872	0.000317164
RNH1	0.261758	0.000838955
CNN2	0.261684	0.000336162
CLPX	0.261675	0.000204754
UBQLN1	0.261471	6.77e-06
CHD1	0.261135	0.000279705
AMD1	0.260973	0.000207486
EIF2A	0.260678	2.47e-05
DDX3X	0.260205	0.000964976
CCNH	0.259638	4.11e-06
DNAJC7	0.259441	1.23e-06
RTN4	0.259131	0.000605813
FKBP15	0.258917	9.25e-05
RC3H2	0.258016	4.76e-05
IFRD2	0.257743	0.000237688
PGGT1B	0.257677	3.59e-06
TCP1	0.257519	5.82e-06
PGAM5	0.257358	8.95e-05
SPTY2D1	0.256725	0.000274285
RRM1	0.256722	0.000318954
TXLNG	0.25615	0.000674009
SPOPL	0.255539	0.000803435
KIF3A	0.255292	0.000749192
HNRNPAB	0.255158	2.69e-05
SRP19	0.25509	0.000252854
BTBD10	0.255036	0.000500381
ZCCHC9	0.254938	1.9e-05
CTNNA1	0.254591	4.82e-05
ATP6V1H	0.253924	0.000793893
SRFBP1	0.253789	0.000463906
THG1L	0.253747	0.000216259
COG3	0.253643	0.000150732
HDAC3	0.253359	9.89e-07
WDR77	0.252914	0.000119339
RAN	0.252811	8.44e-05
STRAP	0.252515	4.06e-05
NACA	0.250719	5.1e-05
TNIP1	0.24879	0.000821919
WDR41	0.248784	8.82e-05
G3BP1	0.24848	5.81e-06
SLC38A9	0.247737	0.000922847
CCT8	0.24747	1.03e-05
SLC25A46	0.247293	0.00013121
PSMD5	0.246981	0.000308361
METAP2	0.246924	7.17e-08
CALCOCO2	0.246784	1.58e-05
EXOC2	0.245824	0.000104754
NUFIP1	0.24468	0.000196146
SLC35F6	0.244392	0.000619755
ACSL3	0.244267	0.000416246
MICU2	0.24396	0.000114342
TSG101	0.24342	1.97e-05
TMED9	0.243193	0.000615154
UTP3	0.242927	4.81e-05
HSPA9	0.242103	1.32e-05
MRPS31	0.242003	0.000241721
PSMD1	0.240915	4.23e-06
MRPS27	0.240808	7.31e-05
ATIC	0.238969	0.000760344
UBE2D2	0.238906	3.8e-06
GTPBP10	0.238859	0.000276449
SMIM15	0.238629	1.28e-05
CANX	0.238425	0.000598819
DENR	0.238228	2.08e-07
KARS1	0.237652	5.84e-05
CYRIB	0.235907	0.000262115
MFSD14B	0.235446	0.000528846
KCTD5	0.234985	0.000151518
ZNF200	0.233892	4.6e-05
PITPNB	0.233721	3.5e-05
GUF1	0.233443	0.00033581
CCT3	0.232284	0.000148069
CALM3	0.232204	0.000254731
YIPF5	0.231607	0.000257847
NOP58	0.231592	0.00099496
BUB3	0.231117	1.97e-05
IBTK	0.230992	0.000137668
SDAD1	0.230949	0.000878829
MACROH2A1	0.230583	5.71e-05
MSH3	0.230239	0.000810404
PSMD6	0.230205	5.28e-05
ALAS1	0.229518	0.000570627
GSPT1	0.229127	3.06e-05
RSL1D1	0.22902	7.6e-05
UTP14A	0.228303	0.000779781
DIMT1	0.228208	8.34e-05
MED7	0.227955	0.000905312
KPNB1	0.227717	1.68e-06
TSR1	0.227622	0.000745512
NOB1	0.227571	0.000271167
MTREX	0.227525	0.000392843
RAD23B	0.227471	0.00026046
ANAPC4	0.227394	0.000999411
CDC37	0.22703	0.000866655
PLRG1	0.226489	1.51e-05
RAB14	0.226252	2.05e-05
VPS35	0.225478	6.68e-05
PSMD9	0.224596	0.00073293
COPZ1	0.224302	5.68e-06
MMS19	0.22402	1.49e-05
EIF3D	0.223413	0.00017536
PAFAH1B2	0.22295	0.000769604
DCTN2	0.22284	2.65e-05
SPRYD3	0.222497	0.000993045
ACTR2	0.222009	0.000740334
UBE2E1	0.221699	0.00064222
BCCIP	0.220527	0.000425111
STRIP1	0.220095	0.000398793
EIF3H	0.21884	0.000581258
RPS6KB1	0.21873	0.000317996
YWHAB	0.216813	0.000172571
UBC	0.216793	0.000202636
C11orf58	0.21678	8.04e-05
HMGXB3	0.216692	3.83e-05
NAA35	0.2156	0.000335405
EIF4B	0.215466	0.000623944
DNAJA2	0.214803	0.000214398
PSMD12	0.214499	4.17e-05
GRSF1	0.21441	4.33e-05
FBXO22	0.214213	0.000459552
DNAJC25	0.214127	0.000500182
PSME3	0.213648	4.01e-05
HCCS	0.213258	0.000903979
CSNK1G3	0.212718	0.000171209
VPS26A	0.21258	5.09e-05
CCT7	0.211951	0.000815581
FAM98A	0.211872	0.000194431
BBS7	0.211571	0.000209716
BMS1	0.211417	7.8e-05
CACUL1	0.211125	0.000926178
SEC63	0.211124	0.000320432
SRP72	0.210286	0.000530178
CDC23	0.208453	0.000387792
XPO6	0.20844	0.00028475
RNF14	0.207417	0.000807035
ZMAT2	0.207413	0.000640354
HEATR3	0.207031	0.000748167
ATG16L1	0.206954	0.000743815
TMBIM6	0.206567	0.000161163
ACTR3	0.20591	0.000712585
MTO1	0.20574	0.000135519
MGAT4B	0.204359	0.00078183
EIF2B1	0.204351	7.78e-06
PFDN1	0.204261	0.000262416
RPF1	0.20409	0.000426634
NCBP1	0.203606	0.00041585
TRIP4	0.20333	0.000431388
HNRNPA1	0.203319	9.9e-05
ISG20L2	0.202807	0.000146596
IK	0.202739	0.000128846
RBM22	0.202534	3.28e-05
SLC25A3	0.202049	0.000348433
EIF3J	0.201683	0.000392658
PAIP2	0.20094	0.000233558
HARS2	0.200581	0.000273706
FAM120A	0.200517	0.000825547
UBE2K	0.199848	0.000759386
CDC27	0.199778	0.000191908
AIMP1	0.199564	0.000110864
NDFIP1	0.199441	0.000725231
ECPAS	0.198951	0.000459226
TENT2	0.198363	0.000230418
HNRNPK	0.197361	9.91e-08
PPID	0.197281	0.000681137
TBC1D9B	0.195519	0.000851416
MAPK9	0.195069	0.000643739
FOXK2	0.194222	0.000299845
LARS1	0.193289	0.000200932
SYNCRIP	0.191415	0.000375824
DHX15	0.190731	0.000418011
UBE2N	0.189813	0.000643925
DCTN5	0.189184	0.000775779
ELOA	0.186829	0.000614779
SLTM	0.186663	0.000146596
ECD	0.18439	0.000205483
PTBP1	0.183151	1.4e-05
PTGES3	0.183018	0.000430613
RPAP2	0.181305	0.000636963
CCDC43	0.176003	0.000168841
RAB35	0.175128	0.000150732
RBM27	0.174235	0.000794319
SMARCD1	0.172203	0.000789931
SRP68	0.171436	0.000552571
ABRAXAS2	0.169676	0.000560548
ZNF207	0.163	2.48e-05
VTI1A	0.159112	0.000969257
HNRNPC	0.156846	0.000838955
TIAL1	0.155928	0.000383874
THRAP3	0.152041	0.000638111
CELF1	0.151696	0.000939442
KHDRBS1	0.123136	0.000104001
ZNF2	-0.192408	0.000838913
RBM23	-0.198619	0.000136284
SNAPIN	-0.201345	0.000459783
C14orf93	-0.202557	0.000754539
H3-3A	-0.213912	0.000798021
EPC1	-0.214123	0.000122834
DCAF11	-0.215111	0.000171209
ATPAF1	-0.220604	0.000713061
PRR14	-0.229113	1.11e-05
ZSCAN26	-0.23312	0.000982104
PGBD2	-0.23365	0.000945544
ZNF689	-0.250512	0.00040755
MUTYH	-0.250935	0.000827055
ORMDL3	-0.251392	0.000993045
DDX19B	-0.253776	0.000441227
SLC35A5	-0.253955	0.000513697
CNST	-0.256302	0.000800186
NSL1	-0.256989	8.02e-05
ZNF496	-0.259307	0.000468378
ABHD10	-0.261189	0.000775904
KLC4	-0.26401	0.000988902
ZNF34	-0.268843	0.000465035
C19orf54	-0.269416	0.000288965
ZNF747	-0.274451	2.64e-05
MRPL34	-0.274926	0.000659282
CYP20A1	-0.276155	2.78e-05
AP002990.1	-0.280365	0.000697261
AGO1	-0.281396	0.000244327
MSL2	-0.285809	0.000409815
ZBTB14	-0.286138	2.34e-06
BCAS3	-0.287378	0.000114342
MAP1S	-0.287785	0.000737126
POGLUT1	-0.289327	4.81e-05
GPR137	-0.290141	0.000274981
UBE2D3-AS1	-0.290316	0.00099412
ZSCAN9	-0.291408	9.31e-05
ZSCAN2	-0.294393	0.000881105
EIF3J-DT	-0.29458	0.000278936
TMEM42	-0.295686	0.00061927
BMI1	-0.297557	2.25e-05
RNF166	-0.29771	0.000582019
TMEM50B	-0.297885	2.99e-05
ZNF672	-0.300729	1.81e-05
IQSEC1	-0.306263	0.000385251
INCA1	-0.30689	0.000744574
RTL6	-0.307835	0.000506201
HDAC5	-0.308263	1.68e-05
H1-10	-0.308977	0.000680038
ARL6	-0.309542	0.000879064
HERPUD1	-0.310729	0.000348433
OCEL1	-0.311129	0.000463906
CBFA2T2	-0.311761	0.000932693
ING4	-0.312487	0.000952719
ZNF678	-0.312841	0.000168895
SENP7	-0.313379	0.000351494
ACTR1B	-0.316614	3.47e-06
PCBP1-AS1	-0.316933	0.000419289
VMAC	-0.317499	0.00049477
SETMAR	-0.317968	0.000739425
CASP9	-0.318106	6.11e-05
ASTE1	-0.318107	5.27e-05
RRAGB	-0.318308	0.000280846
H6PD	-0.320922	0.000497805
DUSP28	-0.321527	0.000114273
COA5	-0.321986	3.31e-06
ZNRD2-AS1	-0.322708	0.000269757
C17orf67	-0.323315	0.000380598
ENTPD1	-0.323942	0.000121959
BDH2	-0.324084	0.000371893
TCEAL1	-0.324146	6.03e-05
PTPN18	-0.326659	0.000252854
GDPGP1	-0.326769	0.000762661
IL10RB-DT	-0.32761	0.000922681
WDPCP	-0.328414	0.000416246
PHTF1	-0.330197	0.000136712
ZNF383	-0.331018	0.000440492
G6PC3	-0.333091	0.000500495
DHX35	-0.333275	0.000500552
ZNF875	-0.335699	0.000438566
NEK8	-0.33685	5.55e-05
SOS1-IT1	-0.336998	0.000233509
WFS1	-0.337775	0.000627538
ZNF30	-0.337995	0.000889426
ASMTL	-0.33883	0.000312255
TRIM8	-0.339883	1.58e-05
ZNF181	-0.34011	4.74e-05
ZNF527	-0.34123	0.000410617
PDCD4-AS1	-0.342343	0.00040559
TRAK2	-0.342857	2.76e-05
AC012358.3	-0.343206	0.000119833
ZFAND4	-0.344803	0.000257236
SFI1	-0.346704	6.12e-05
NIFK-AS1	-0.347774	8.54e-05
HEXIM2	-0.347839	2.29e-05
FRS3	-0.348211	0.000242378
TAF9B	-0.350982	0.000109787
AL162377.1	-0.351318	0.000150209
ZNF783	-0.351599	3.28e-05
ZNF141	-0.352764	0.000293618
KLHL26	-0.353149	3.36e-05
CD99L2	-0.354737	0.000451323
SP2-AS1	-0.355157	0.000473889
ZSWIM3	-0.356111	1.82e-06
STK36	-0.356343	1.92e-05
WDR5B	-0.356503	5.84e-06
AC022916.2	-0.35842	0.000858124
CCPG1	-0.358926	0.000175048
ZNF780B	-0.360341	2.26e-05
NFIC	-0.360461	0.000124213
PKN3	-0.361	0.000905312
LRRC8C-DT	-0.361538	0.000890813
ZNF260	-0.363168	1.25e-05
CARD8	-0.36364	5.75e-07
TMEM143	-0.365659	0.000647725
INTU	-0.36661	0.000193484
URB1-AS1	-0.366766	0.000863142
AC005670.3	-0.367844	4.86e-05
SEMA4C	-0.368704	0.000100564
IFT140	-0.369271	7.5e-05
TRAF3IP2-AS1	-0.369355	8.3e-05
CKLF	-0.371141	0.00018946
LRRC37A17P	-0.372611	0.000569785
ZNF554	-0.37274	0.000127636
ACVR2A	-0.373029	3.38e-05
AC027097.1	-0.373271	0.000364374
ANKRD39	-0.373668	0.000583772
LINC00339	-0.373691	2.59e-06
AC005332.4	-0.374699	0.000320479
IQCH-AS1	-0.375324	1e-05
TMEM198B	-0.375331	7.19e-05
AC060780.1	-0.375342	0.0001167
ZNF70	-0.376282	3.14e-05
AC027097.2	-0.376304	0.000997121
PEPD	-0.376795	8.88e-09
NRL	-0.376837	1.67e-05
FMC1	-0.37704	0.000839407
SLC35E2A	-0.378187	0.000658842
FAM102B	-0.380202	0.000383889
GMDS-DT	-0.380629	3.26e-05
GPRASP2	-0.381142	0.000459226
RBM38	-0.381215	0.000153645
U2AF1L4	-0.381369	0.000443589
OTULINL	-0.381428	0.000665379
UBE2D4	-0.382164	1.1e-06
EAF2	-0.382703	0.000996339
DGKD	-0.383679	0.000262885
ZNF891	-0.383851	7.96e-05
CEP68	-0.383909	3.06e-06
PIAS2	-0.383946	8.23e-06
LZTS2	-0.38466	1.69e-07
DPYSL2	-0.385319	0.00039004
LINC01011	-0.385773	0.000176598
THBS3	-0.386333	0.000174745
SPRY1	-0.387258	0.00071285
ESAM	-0.388069	0.000129992
AL050341.2	-0.388535	0.000239896
INSR	-0.38933	0.000178892
DRC3	-0.390416	0.000703911
BAIAP2-DT	-0.391677	2.23e-05
AC004803.1	-0.391733	0.000825448
AATK	-0.392565	0.000713815
DDAH2	-0.393212	0.000180228
INTS6L	-0.395515	0.000263954
ZBTB42	-0.396549	3.68e-06
MAN2A2	-0.396775	0.000827574
ADD3	-0.397622	0.000914389
GGA2	-0.398362	2.33e-06
AC135178.4	-0.398608	0.000616121
SLC27A1	-0.398866	4.73e-05
ACOT2	-0.399351	2.84e-05
IL1R1	-0.399717	0.000831622
ANTKMT	-0.400151	0.000988402
PLA2G6	-0.400279	0.000186891
CXXC5	-0.400654	0.000426658
HIGD1B	-0.401056	0.000988852
THTPA	-0.402521	2.5e-06
SIGIRR	-0.403424	0.000807735
ADCY4	-0.403583	0.000386053
KANK2	-0.404066	0.000131352
DIPK2B	-0.404393	0.000904887
IFT172	-0.404514	6.96e-06
LMF1	-0.406716	0.000414386
NDUFV2-AS1	-0.4072	3.93e-05
AKNA	-0.408679	0.000533339
NUDT16	-0.408718	6.12e-07
TCEAL3	-0.408876	0.000295573
RGL1	-0.409204	0.000152914
AC008124.1	-0.409272	7.9e-06
BID	-0.410458	7.6e-06
OLMALINC	-0.412187	0.000655771
ARHGEF19	-0.412194	0.000127997
TRAM2-AS1	-0.412448	5.19e-05
C6orf226	-0.412482	7.8e-05
LINC00899	-0.412523	0.00034147
PKIG	-0.412859	0.000675177
PLXND1	-0.412922	0.000120734
LRRC27	-0.413147	0.000157054
AC002310.5	-0.414523	0.000582118
PRAF2	-0.415558	0.000148827
PLEKHO1	-0.417309	0.000667588
ARIH2OS	-0.418064	0.000252461
SGMS1-AS1	-0.418136	6.11e-05
ZNF596	-0.418579	3.46e-05
MMP15	-0.41932	0.000304219
ZNF843	-0.420104	0.000846925
IL3RA	-0.420351	0.000605996
AC009113.1	-0.420404	0.000154762
FAM186B	-0.421043	9.43e-05
ZNF708	-0.421943	0.000720186
MIR762HG	-0.422267	2.96e-06
SLC25A29	-0.422435	0.000158641
AC074212.1	-0.422527	0.000258726
FAM117B	-0.422733	0.000940643
DLL4	-0.423155	9.66e-05
TTLL1	-0.423181	1.2e-05
ZNF573	-0.423248	0.00077255
GIPC3	-0.424415	0.000795778
AC093278.2	-0.424528	0.000841864
YPEL3	-0.425753	1.65e-06
ZNF56	-0.425777	4.06e-05
ZNF100	-0.426574	0.00064107
PHC1	-0.42667	9.24e-05
CCDC189	-0.427628	0.000930154
AL391121.1	-0.427814	0.000425432
BTG2	-0.428033	0.000597678
SFMBT2	-0.428573	0.000597183
TSGA10	-0.42929	0.000141001
PAXBP1-AS1	-0.429571	9.71e-06
ZNF775	-0.429846	1.9e-05
PIK3IP1	-0.430975	8.6e-05
AC087500.1	-0.431254	0.000367706
ADAMTSL2	-0.432188	0.000428671
GALM	-0.43269	0.000483101
C19orf73	-0.432971	0.000744514
AC090114.2	-0.432997	4.07e-05
LAGE3	-0.433199	0.000602139
AC091982.3	-0.433965	9.82e-05
MAGED1	-0.434076	0.000244759
ZNF32	-0.43427	1.18e-05
LCA5L	-0.434835	0.000520847
ARID5A	-0.434987	9.46e-06
AC000068.1	-0.435903	9.73e-05
ADGRL4	-0.43679	0.00033776
AC106782.5	-0.436828	0.000775904
INKA2	-0.438649	1.22e-06
CROCC	-0.439132	0.000318047
SLC9A3R2	-0.440182	7.7e-05
LRRC29	-0.441203	0.000114985
ZNF529	-0.441413	7.29e-06
EIF1B-AS1	-0.441827	0.000150209
FAM227B	-0.441928	0.000175956
ARVCF	-0.44221	5.04e-05
VWA5A	-0.443251	0.000981052
AF111167.2	-0.443546	0.000614779
AC092910.3	-0.444495	3.05e-05
PHACTR1	-0.444949	0.000587973
DUSP19	-0.445991	8.15e-05
PRORSD1P	-0.446245	0.000347985
GLIS2	-0.446616	0.000789317
PLPP5	-0.44729	0.000207853
RNF144A	-0.447381	8.74e-05
UNC79	-0.448305	0.00069554
AL645568.1	-0.448591	9.78e-06
PLB1	-0.449232	0.000830315
AC068888.1	-0.449356	0.000864606
ZNF506	-0.449523	0.000444667
ZNF302	-0.449821	9.14e-07
CEP70	-0.449858	0.000142689
LINC01132	-0.450205	0.000430142
LNP1	-0.450668	6.74e-05
ITM2C	-0.451201	7.9e-05
SUOX	-0.451539	4.54e-08
SLC25A23	-0.451657	0.000600759
LINC01569	-0.452894	0.000573258
PPP1R3F	-0.453015	0.000399216
ZNF615	-0.45314	7.12e-05
AL683813.2	-0.453354	0.000624169
MVB12B	-0.453879	0.000661828
AL133367.1	-0.454851	0.000263735
LMO2	-0.455392	0.000127457
DOK1	-0.455553	8.05e-05
TFDP2	-0.455637	3.29e-05
ENKD1	-0.456445	0.000141069
MTURN	-0.45674	0.000230199
ZNF48	-0.456891	1.49e-06
POU6F1	-0.456924	8.43e-05
GPD1L	-0.45736	0.000281523
ADPRH	-0.457438	1.61e-05
PHYH	-0.457523	0.000606572
NR2F2	-0.458422	0.000128385
VWF	-0.458471	0.000642129
ZNF362	-0.45937	1.68e-09
CRTC1	-0.459827	1.56e-07
CDC14A	-0.460588	0.000221432
DNAJC4	-0.460624	8.83e-08
SRRM5	-0.461767	0.000329594
FAM117A	-0.462216	2.21e-05
ACADSB	-0.462635	0.000119468
AC107959.1	-0.46264	0.000103408
SOX4	-0.462735	0.000204754
C17orf100	-0.463045	1.39e-05
RAMP3	-0.463253	0.000549235
BX322234.1	-0.463451	0.000400376
RASA3	-0.463932	0.000230813
ZNF808	-0.464919	0.000606541
TCF4	-0.465255	6.87e-05
LINC02361	-0.465288	0.000323162
AC124242.1	-0.465771	0.000452151
PPM1M	-0.466468	5.13e-08
CBLN3	-0.466518	7.29e-05
RHOBTB1	-0.467026	0.000606097
PLD3	-0.467408	2.76e-07
PAXIP1-AS1	-0.467425	0.000123122
DUSP23	-0.468499	7.48e-05
TRAPPC6A	-0.468633	0.000543958
CNNM3	-0.468685	1.75e-08
USHBP1	-0.468706	5.91e-05
VASH1	-0.46889	8.38e-05
ANGPTL6	-0.470487	6.28e-06
LINC00239	-0.470511	0.000624169
HSF2BP	-0.470639	0.000746035
PODXL	-0.470737	0.000752315
TOLLIP-AS1	-0.471173	0.000361958
RILP	-0.471374	2.21e-07
AC002310.1	-0.472237	1.12e-05
NSMCE1-DT	-0.472549	0.000919495
AC010504.1	-0.472914	0.000598626
DNMT3A	-0.473085	3.27e-08
ZNF518A	-0.473155	3.08e-07
ALDH6A1	-0.473914	9.44e-06
ECHDC2	-0.473985	0.000384784
SPIN2B	-0.474832	2.89e-06
KLF12	-0.474913	0.0006991
SLC25A42	-0.476036	3.15e-05
VOPP1	-0.476336	0.000418011
AP005329.2	-0.477111	0.000215039
AC096677.1	-0.477241	0.000454594
NCF4	-0.477456	0.000394837
COQ10A	-0.477987	4.21e-05
PHETA2	-0.479152	6.55e-07
ST6GALNAC3	-0.479165	0.000423396
GLCCI1	-0.479966	2.78e-05
ZNF599	-0.480236	1.96e-09
ZSCAN12	-0.4805	6.07e-05
SLC26A11	-0.480714	2.68e-07
AC009086.2	-0.480879	0.000169746
USP27X-AS1	-0.480883	3.49e-06
AC012615.1	-0.481009	0.000496613
TNRC6C	-0.481126	1.75e-06
ZNF436-AS1	-0.481158	2.04e-05
GGN	-0.482105	3.37e-05
C10orf143	-0.48366	3.7e-05
MDP1	-0.484331	1.51e-07
AC087752.3	-0.48443	0.000864672
ORAI2	-0.484826	4.2e-05
PIK3R6	-0.484887	0.000202285
LRMDA	-0.484992	0.000373391
LINC01715	-0.485709	0.000634727
CYP2U1	-0.485917	0.000117316
FZD4	-0.486165	5.67e-05
PLCB2	-0.486579	0.000227473
AL021707.2	-0.486985	3.52e-06
ZNF233	-0.487364	0.000200705
RTL8B	-0.487918	1.15e-06
AC036176.1	-0.488254	0.000388914
MIR497HG	-0.488466	0.00030108
USP11	-0.489381	7.89e-08
LINC01521	-0.489868	0.000231591
NPHP1	-0.490308	0.000243751
ZNF862	-0.491308	1.48e-05
DLG5-AS1	-0.491411	0.000667554
ZNF132	-0.491617	7.19e-07
PREX1	-0.491721	0.000138786
AC108488.1	-0.491777	0.000127329
RGL4	-0.49185	0.000455125
ARHGAP31	-0.49193	0.000385801
MACROD1	-0.492007	0.000371893
DISC1	-0.492237	0.000644637
AC092117.1	-0.492805	0.000890843
AL136295.6	-0.492926	5.35e-05
ABCA2	-0.492937	0.000394637
CC2D2A	-0.493362	4.95e-05
FKBP7	-0.493622	0.000368427
TMEM98	-0.493643	0.000777594
IDUA	-0.494281	0.000106335
KLHL3	-0.495673	8.58e-05
AC015813.6	-0.49626	8.69e-06
H2AZ2P1	-0.496524	0.000598103
EFCAB2	-0.496739	4.57e-05
SMCO4	-0.496989	7.61e-05
STAB1	-0.497261	0.000299891
ZNF10	-0.497494	6.26e-06
DLC1	-0.497644	0.000655196
ZNF585B	-0.497886	8.33e-05
LBX2-AS1	-0.497979	1.17e-05
NCK1-DT	-0.498174	8.6e-06
STARD8	-0.498702	0.000150732
RASGRP3	-0.498784	1.51e-05
DBP	-0.49891	6.67e-05
VPS35L	-0.498922	6.34e-07
BST1	-0.499503	0.000284433
CDH5	-0.502726	0.00017123
VILL	-0.502756	0.00048055
AC007780.1	-0.502865	8.22e-05
JADE1	-0.502974	1.75e-07
ZNF718	-0.503151	0.000266241
ZNF331	-0.503398	0.000304557
UGDH-AS1	-0.503512	4.97e-07
BSCL2	-0.504705	9.15e-08
ITGA10	-0.504883	0.000793548
S100A4	-0.505354	0.000128094
CNTNAP1	-0.5054	8.83e-05
ARRDC2	-0.506127	3.93e-06
ARHGEF40	-0.50678	0.000264625
SBNO1-AS1	-0.507446	0.000794241
MILR1	-0.507459	0.000945567
AC007114.1	-0.507514	0.000293158
JCAD	-0.50873	0.000963373
ANXA6	-0.508966	0.000386108
CATSPERG	-0.509018	0.000178004
AC007191.1	-0.509217	0.000674534
DAPK2	-0.509299	0.000128076
PAPLN	-0.510152	0.000768059
AP002748.4	-0.510362	3.66e-06
MRC2	-0.511027	0.000208792
HHEX	-0.511114	0.000260942
MAGEH1	-0.511624	4.3e-05
TAF1A-AS1	-0.511702	3.21e-05
AC138207.8	-0.512621	0.000528104
BX537318.1	-0.512697	1.62e-05
ARHGEF15	-0.513044	3.08e-05
AC068620.1	-0.513374	0.000413003
GGT5	-0.513714	0.000448322
OSGEPL1-AS1	-0.514427	0.000648902
LRP3	-0.514479	0.000671636
ALOX5	-0.514706	0.000586741
AC096992.2	-0.516223	5.41e-05
TIE1	-0.51642	7.33e-05
ZNF585A	-0.516558	1.61e-05
GUCY1B1	-0.516603	0.000614104
RRN3P2	-0.516845	0.000133338
WIPF1	-0.516967	4.75e-05
ZNF404	-0.5178	0.000432447
HCLS1	-0.51854	0.000378784
ZNF701	-0.519246	0.000269581
USP13	-0.519529	0.000607168
TSPYL2	-0.519533	2.4e-07
AL450998.2	-0.519614	5.92e-07
OSBPL7	-0.519884	7.35e-06
POMGNT2	-0.519966	2.52e-07
ZNF566	-0.520077	5.78e-07
YPEL4	-0.52116	6.6e-05
SEMA4G	-0.521676	0.000299834
KCNAB2	-0.522345	1.49e-06
TLR1	-0.522624	0.000831804
AL133215.2	-0.523065	0.000270987
BHLHB9	-0.523245	2.89e-06
AC241585.1	-0.523985	0.000423563
RPS10P7	-0.524257	3.91e-05
FBXO32	-0.524515	0.000834879
ACBD4	-0.524588	1.46e-06
FUCA1	-0.525012	3.47e-07
ZCWPW1	-0.525333	0.000172936
LDB2	-0.525946	2.53e-05
VAMP1	-0.526626	1.51e-05
AC005520.4	-0.527117	0.000442917
MEST	-0.527715	0.000298445
AL024498.1	-0.528009	0.000240708
GPR35	-0.528409	0.000133342
AL162595.1	-0.528486	0.00036472
PPP1R3E	-0.528586	4.83e-08
PLXNC1	-0.528683	0.000508474
CPT1C	-0.529007	0.000183579
LGALS9	-0.529709	0.000454906
PEX11G	-0.530028	4.9e-06
HHAT	-0.530068	9.11e-06
C5	-0.530507	0.000762702
AC068987.3	-0.530799	0.00040248
TMEM273	-0.531139	5.76e-05
RASGRF2	-0.53114	0.000413124
IFITM3P6	-0.531161	0.000416198
ITGA9	-0.531253	0.000297538
FAM229B	-0.531574	0.000631939
HSD17B7P2	-0.531893	0.000172571
AC008105.2	-0.531918	0.000687236
AL442663.3	-0.532055	9.14e-05
ANKRD44	-0.532292	5.6e-05
AL928654.1	-0.532348	0.000414812
TVP23A	-0.532364	2.74e-05
SSC4D	-0.533297	0.000459621
AC006449.5	-0.534118	6.08e-05
SLC12A7	-0.534344	0.000614589
CUBN	-0.534436	2.11e-05
AC008555.2	-0.53468	0.000708741
AL121672.2	-0.53491	0.000621967
MINCR	-0.53492	0.000430613
Z97634.1	-0.535368	0.000388225
PLSCR4	-0.53602	5.56e-05
FAM78A	-0.536085	0.000113642
GAREM2	-0.536585	0.000111451
AP001432.1	-0.537486	0.000292695
CD2BP2-DT	-0.537739	1.62e-08
AC012313.6	-0.538269	0.000927244
FAM124B	-0.54024	0.000382694
EPB41L1	-0.540474	0.000351368
TMC8	-0.540652	8.42e-05
C1orf115	-0.540981	0.000687617
PBXIP1	-0.541308	4.71e-10
AC092835.1	-0.541633	0.000284433
ICA1L	-0.541886	0.000221432
AP001033.3	-0.542034	0.000549235
CYB5A	-0.542233	0.000252447
LINC01089	-0.54226	0.000403814
CAPN11	-0.542814	0.000350246
TRIM45	-0.543722	1.97e-05
GPR132	-0.543822	2.8e-05
DIPK2A	-0.544037	0.000163545
ARSG	-0.544389	1.99e-08
KCNIP2	-0.544742	0.000816544
AMZ2P1	-0.544791	1.22e-05
LINC02846	-0.544863	0.000740653
TMEM240	-0.544926	0.000654556
CHADL	-0.544963	0.000477423
SMARCD3	-0.544974	0.000303223
KANK3	-0.545335	8.39e-07
HCG11	-0.546127	6.11e-05
SPATA25	-0.546558	0.000172168
SASH3	-0.546581	0.000759046
ZNF571	-0.546604	1.48e-05
METRN	-0.547325	0.000279705
PATZ1	-0.5474	9.84e-09
IPCEF1	-0.547491	0.000660094
EBF1	-0.547795	0.000348433
CCM2L	-0.547923	1.88e-06
ZNF14	-0.548059	9.14e-05
AC106028.3	-0.548322	3.71e-05
MEF2B	-0.548721	0.000239969
BATF	-0.548852	0.000588423
SPATA6	-0.548944	0.000209598
PKDREJ	-0.549061	0.000966282
A2M-AS1	-0.549303	0.000163545
EHD3	-0.549318	5.36e-06
ST8SIA1	-0.54984	0.000747703
DLGAP1-AS1	-0.551345	6.97e-06
HIPK4	-0.552544	0.000802936
C2CD4D	-0.553421	0.000390238
TMEM231	-0.553793	0.000306611
LPIN2	-0.554033	2.96e-06
GRASP	-0.554101	2.41e-05
LOXL1-AS1	-0.554775	8.79e-05
AC036108.3	-0.554912	0.000448959
TRPV4	-0.554938	0.000256339
LIPE	-0.555265	0.000252461
GNAO1	-0.555414	0.000133709
LMCD1	-0.55551	0.000194463
ACRBP	-0.555981	2e-05
REPIN1	-0.556394	6.51e-07
SYT11	-0.556843	2.06e-05
TCEA2	-0.55721	1.12e-06
RARA-AS1	-0.557425	4.23e-06
GTSE1-DT	-0.557548	2.59e-05
HPCA	-0.558248	0.000151014
RHOJ	-0.55837	1.14e-05
NOX4	-0.558569	0.000400372
ORAI3	-0.55866	9.81e-08
DMTN	-0.558739	0.000424928
DEPP1	-0.558845	0.000942523
TPBGL	-0.559001	0.000649415
WDR78	-0.56022	0.000466931
ARHGAP24	-0.560315	0.00022947
ASGR2	-0.560486	0.000365379
MAGI2	-0.561267	4.12e-05
CLEC14A	-0.561623	1.11e-06
PECAM1	-0.561679	3.72e-06
RUBCNL	-0.561867	0.000467849
DMGDH	-0.562517	2.8e-05
ACAP1	-0.56256	5.7e-06
OVOL3	-0.562636	0.000928702
ADAMTS9	-0.562721	0.000875794
GPR162	-0.562976	0.000182022
RAB33A	-0.563045	7.65e-06
CACNA2D4	-0.564029	6.35e-07
ZC3H12D	-0.564038	0.000235703
ARHGAP15	-0.565147	0.000104498
USP51	-0.565405	6.61e-05
LYL1	-0.565881	2.92e-06
AL451085.3	-0.566073	1.46e-05
NRIP2	-0.566802	1.96e-06
ZNF671	-0.566822	2.28e-05
TNS2	-0.567148	3.91e-08
SLC46A1	-0.567262	3.97e-06
SUSD3	-0.568565	0.000137757
AC012313.5	-0.568804	3.63e-06
AC005837.1	-0.569156	0.000144807
ZNF606	-0.569283	5.24e-05
GASK1B	-0.570004	0.000470388
AC026412.1	-0.570127	0.000485931
SYTL4	-0.570357	5.72e-06
C19orf38	-0.57091	0.000121567
RASAL3	-0.571178	0.000136614
PRKG1	-0.571224	0.000501542
HNMT	-0.57128	2.96e-05
HIC1	-0.571576	7.9e-06
AC025171.3	-0.572389	0.000916739
CDKN1C	-0.572584	0.000757967
SNTB1	-0.572646	2.01e-05
SCGB2B2	-0.572916	2.59e-05
OSER1-DT	-0.572953	2.47e-05
AP003721.4	-0.57334	0.000280452
PRTFDC1	-0.573925	6.57e-05
ERO1B	-0.574106	0.000107584
AC015922.3	-0.574418	0.000383356
CHST10	-0.574436	0.00090217
AL354892.2	-0.574605	1.09e-05
AC011468.5	-0.574646	3.21e-05
LINC00337	-0.57485	0.000183138
SH2D3C	-0.575283	1.3e-08
ROM1	-0.57536	2.07e-08
RNF125	-0.576097	2.07e-05
PRKAR2A-AS1	-0.576139	8.05e-08
LINC02481	-0.576154	0.000213899
GBGT1	-0.57646	3.8e-06
SCCPDH	-0.576835	1.13e-05
ZC2HC1C	-0.577018	1.91e-07
AQP1	-0.57749	6.07e-06
TMPRSS6	-0.577503	0.000986841
CD27-AS1	-0.577553	5.74e-08
AC010883.1	-0.577778	0.000922681
MGAT4A	-0.578107	4.69e-06
JAM3	-0.578153	1.67e-05
IL6R-AS1	-0.578304	0.000277507
TEK	-0.578413	9.32e-05
AC026801.2	-0.578513	0.000602052
SUCLG2-AS1	-0.578587	0.000126282
DHRS4-AS1	-0.57944	1.81e-08
GIMAP6	-0.579564	0.000100978
CACNB2	-0.5796	7.16e-05
AC135048.1	-0.579645	0.00016431
PDE2A	-0.580357	0.000119298
CASP17P	-0.581064	4.84e-05
HEY2	-0.581199	3.64e-06
MAP2K6	-0.581608	8.43e-05
PLCE1	-0.582084	2.52e-05
SATB1	-0.582398	8e-06
ZNF772	-0.582652	7.54e-05
PCED1B-AS1	-0.58322	0.000376155
DPYSL3	-0.583597	0.000510091
SELENOM	-0.584235	0.00031831
GNMT	-0.584372	0.000627296
NLRC3	-0.58446	8.82e-05
RASL12	-0.584978	1.33e-05
PBX4	-0.585032	3.55e-05
AL356512.1	-0.585376	0.000869119
NDRG2	-0.58548	0.000100683
NAPA-AS1	-0.585503	4.73e-08
RFTN2	-0.585649	1.89e-05
DNAJC27-AS1	-0.585783	4.34e-05
LRRC7	-0.585929	0.000516397
GIMAP7	-0.585952	0.000228034
DDAH1	-0.586103	0.000119373
SSBP3-AS1	-0.586238	0.000527008
LINC01135	-0.586402	0.000363138
LINC00667	-0.586487	1.82e-06
YTHDF3-AS1	-0.586672	0.000186891
SNAI3	-0.586882	3.28e-05
AC004877.2	-0.587488	3.83e-05
MATK	-0.588008	0.000929115
AC025048.2	-0.588199	0.000110887
DENND5B	-0.588552	0.000100978
HSD11B1L	-0.589191	0.000232513
AL355297.3	-0.589465	0.000855157
BX537318.2	-0.589778	0.000583121
DSCR9	-0.589961	0.000400372
NEURL2	-0.589984	7e-06
AATBC	-0.590194	0.000280016
ZNF687-AS1	-0.590271	6.25e-07
PTP4A2P2	-0.590365	0.000632843
ZNF154	-0.590563	3.19e-06
BAIAP3	-0.590619	0.000508678
LIMS2	-0.5908	6.89e-05
CORO1A	-0.590838	3.45e-05
HDAC2-AS2	-0.590906	2.1e-05
AC078785.1	-0.592818	0.000150372
SLC6A16	-0.592991	0.000817556
AC091153.3	-0.593088	0.000586741
MEX3B	-0.593711	7.76e-05
NTNG2	-0.594566	1.26e-05
GRID2IP	-0.594881	0.000479601
ATP8B2	-0.595596	6.64e-06
LINC00315	-0.595633	0.000724132
RDH10	-0.595868	6.54e-05
AL513190.1	-0.595958	0.000229769
AC096887.2	-0.596532	7.47e-05
MDH1B	-0.596733	0.000214646
PTPRM	-0.596995	6.53e-06
TNFRSF4	-0.59742	2.14e-05
ZNF501	-0.59762	1.04e-07
EPB41L3	-0.597747	3.8e-05
SERTAD4-AS1	-0.597754	0.000145872
BMF	-0.598041	1.99e-07
PDE4DIP	-0.598068	0.000211784
APOBEC3H	-0.598625	0.000655196
TMEM204	-0.598664	4.32e-07
AC009093.2	-0.599217	0.00021651
C22orf34	-0.599239	0.000627296
TNFSF4	-0.5997	0.000545395
TESPA1	-0.600948	0.000360475
HDX	-0.600953	0.000133259
HEPH	-0.601352	0.000422363
BMP8B	-0.601631	6.15e-05
KCND1	-0.601672	1.57e-05
AC026304.1	-0.601679	0.000456652
PGPEP1	-0.6017	4.16e-06
CD247	-0.602041	0.00050145
FAHD2B	-0.60255	0.000367529
CASTOR3	-0.602747	2.85e-05
IQCD	-0.60294	2.27e-05
P2RY14	-0.603024	0.000493641
FNDC4	-0.603382	3.62e-05
ZNF614	-0.603683	7.67e-06
MEIOC	-0.603932	0.000368427
SOX18	-0.604044	1.52e-06
IPO9-AS1	-0.604588	3.64e-05
AC009506.2	-0.604917	3.56e-10
AC009163.7	-0.605118	1.63e-06
PHC1P1	-0.605419	0.000149333
FES	-0.606213	2.1e-07
CDON	-0.607189	8.56e-05
MYO15B	-0.608059	9.59e-05
SAMD14	-0.608233	5.43e-06
CACNA1C	-0.608335	0.000118672
PTPRS	-0.608442	6.64e-06
S1PR1	-0.608513	2.96e-06
TSPAN11	-0.608526	0.000799731
GNA14	-0.609181	0.000110583
AC127070.4	-0.609359	0.000198521
DCST2	-0.609459	0.000649102
GP1BA	-0.60953	0.000944965
LINC00884	-0.609662	0.000429721
DYRK3-AS1	-0.609725	0.000706585
ARHGEF6	-0.609773	1.89e-05
AC053503.4	-0.609907	0.000148889
BRICD5	-0.610623	0.00033616
AC009237.15	-0.610628	0.000231675
MYL9	-0.611241	0.000443034
KCNJ8	-0.611413	2.41e-05
ATP10A	-0.61142	0.000102268
CD48	-0.612737	0.000678477
ADAMTS2	-0.613483	0.000974075
PARVG	-0.613503	4.43e-05
LY86	-0.613865	0.00013014
KCNC3	-0.613915	0.00022549
CD6	-0.614116	0.000184078
RALGPS1	-0.614711	1.2e-05
SKIDA1	-0.614729	6.71e-06
MAFG-DT	-0.614907	9.9e-06
GIMAP1	-0.615077	3.03e-05
PPM1N	-0.615269	1.9e-05
ANO2	-0.615417	2.46e-05
PLPP3	-0.615505	8.07e-06
BCL6B	-0.615656	1.28e-07
CLDND2	-0.615833	0.00038669
CLEC1A	-0.61592	0.000156129
AL358472.2	-0.61596	7.16e-09
OLFML1	-0.616615	0.000266877
PLBD1-AS1	-0.616707	0.000346576
SYNGR1	-0.616758	0.000140445
RASL11A	-0.617212	0.000864672
TIGD7	-0.617516	7.94e-07
WBP2NL	-0.617963	0.000298183
SLC2A11	-0.618318	5.2e-07
SPARC	-0.618507	0.000364362
TSPAN33	-0.619104	3.43e-05
LDLRAD4	-0.619161	5.15e-05
FAM186A	-0.619224	0.000789418
WDR86	-0.619867	0.000314862
PSD	-0.619951	4.4e-07
ZNF382	-0.620164	4.6e-06
PLLP	-0.620331	1.98e-05
SCARA3	-0.621006	0.000109619
FGD5	-0.621017	5.32e-06
AP000894.4	-0.62111	0.0001567
SLC29A2	-0.621167	3.19e-05
FXYD7	-0.621717	0.000780139
ANTXR1	-0.621753	5.88e-06
TACR2	-0.621756	6.63e-05
TAL1	-0.621809	5.71e-05
FBLN7	-0.621891	0.000149293
ZNF529-AS1	-0.622475	9.87e-07
ZNF69	-0.622566	6.86e-05
CACNA1H	-0.622712	0.00026422
SCGB1B2P	-0.622844	0.000168977
ITPKA	-0.622976	0.000383489
AC004865.2	-0.623188	2.12e-06
MEIS1	-0.623309	1.05e-06
CPAMD8	-0.62344	0.000228791
CNIH3	-0.623709	3.15e-05
ZNF577	-0.6242	4.97e-07
ATP6V0E2-AS1	-0.624218	0.000902308
ZNF354C	-0.624235	6.72e-05
ZNF649	-0.624346	8.21e-07
DACT3	-0.62438	0.000122431
KHK	-0.624454	5.77e-05
EEPD1	-0.62462	1.27e-07
SLC25A45	-0.624653	2.99e-11
MIR29B2CHG	-0.624936	5.63e-05
IFFO1	-0.625089	4.25e-07
LINC01558	-0.625141	0.000264098
BICC1	-0.625351	0.000555978
MMP2	-0.625943	0.000703526
ABHD8	-0.626327	1.57e-10
AL031846.2	-0.626643	0.000739719
AC243772.2	-0.627379	0.000737351
CDKN2C	-0.628176	0.000206087
CKB	-0.628551	0.000428795
PPP1R16B	-0.629371	0.000158954
LINC01006	-0.629441	0.000614589
PDE7B	-0.629501	1.36e-05
TIMP2	-0.629628	8.58e-05
KCNE5	-0.630392	0.000747512
AC040169.1	-0.63061	9.07e-05
THY1	-0.630714	0.000256728
OPRL1	-0.631149	1.44e-06
TNFSF8	-0.631226	0.000543695
COA6-AS1	-0.631345	0.000102296
LINC01348	-0.631951	0.000599289
AL607035.1	-0.632063	0.000661298
BSN	-0.632146	0.000870562
LHX6	-0.632313	9.02e-05
CLECL1	-0.63236	0.000978275
SYCE1L	-0.63244	0.000733008
MERTK	-0.632738	0.000109118
DDX11-AS1	-0.632999	3.43e-05
KCNQ3	-0.633299	0.000683083
HDAC4-AS1	-0.633341	6.1e-05
ZNF528	-0.633541	0.000362894
ZC3H12B	-0.634105	1.7e-05
TMEM47	-0.634249	6.3e-05
SLC51B	-0.634369	0.000843667
GSTO2	-0.63471	0.000317522
P3H4	-0.634897	9.9e-08
AC006213.6	-0.635376	0.000431495
AC022150.2	-0.635481	0.000252829
C3orf14	-0.636605	0.000179224
EBF4	-0.636736	4.83e-05
CD52	-0.636819	0.000210778
HSPB8	-0.636846	0.0004967
AC091271.1	-0.636995	1.46e-07
KIF19	-0.63716	0.000961251
ARHGEF25	-0.638036	3.96e-06
RRN3P1	-0.638139	4.14e-06
AF274858.1	-0.638377	0.000325789
EGFLAM	-0.638554	2.93e-05
AC138207.2	-0.638584	0.000691544
KCNE4	-0.639004	0.000208123
AL109976.1	-0.639274	0.000693927
BMERB1	-0.63932	1.77e-06
DNM1	-0.639598	2.15e-05
C21orf62-AS1	-0.640009	2.17e-05
DTX3	-0.640152	2.18e-08
LCK	-0.640487	2.18e-05
DIRAS3	-0.640919	0.000830043
MRAS	-0.641382	2.44e-05
MRO	-0.641402	0.000702935
AC010615.1	-0.641989	0.000905312
CCDC3	-0.64206	6.87e-05
PCDHB15	-0.642271	4.84e-05
MYLIP	-0.6423	2.42e-06
PTGIR	-0.642426	1.38e-05
LINC02482	-0.642534	5.28e-05
CNBD2	-0.642544	5.72e-05
PLEKHG4	-0.642549	0.000116528
TMEM156	-0.642621	0.000554766
PIK3CG	-0.642687	0.000858428
SYBU	-0.643506	0.000865034
CABLES1	-0.643545	3.62e-06
IRF8	-0.643585	0.000234127
PPEF1	-0.643623	0.00077868
LTA	-0.643628	0.000414386
AKR7L	-0.643766	0.000148889
APLNR	-0.64397	0.000237515
SMAD5-AS1	-0.644125	0.000774714
SLC18A2	-0.644569	0.000306611
CALHM2	-0.644966	1.21e-09
TTBK1	-0.645998	0.000252115
KLF2	-0.646079	8.94e-07
LINC02021	-0.6465	0.000341128
CRYZL2P	-0.646831	9.27e-06
FAM227A	-0.647149	0.000246823
ARMCX4	-0.647415	3.55e-08
NLRP6	-0.648145	0.000389367
RRAGD	-0.648727	2.05e-05
TEX22	-0.649165	0.000192427
AC006449.7	-0.649478	8.56e-09
BOLA1	-0.649493	2.35e-09
PTGES3L	-0.650036	0.00020703
DND1P1	-0.650263	0.000101428
GPX7	-0.650352	1.98e-05
ZNF137P	-0.650395	0.000132636
LYVE1	-0.651163	0.000631498
AC106820.3	-0.651472	6.11e-05
AC024560.2	-0.651568	0.000728394
LRRC36	-0.652636	0.000590926
OTX1	-0.652894	0.000269982
CAPS	-0.652952	0.000897503
AC090061.1	-0.653189	0.000146541
TFPI	-0.654286	4.45e-06
CABP4	-0.654567	0.000200667
GNB3	-0.654636	0.000170487
NFATC4	-0.654766	2.93e-06
RPL10P19	-0.655094	0.000794158
KLF3-AS1	-0.655099	1.63e-05
FCMR	-0.655249	2.81e-06
AC018926.3	-0.65542	0.000230199
INSL3	-0.655668	0.000206544
VSTM4	-0.656024	0.00017216
SPAG8	-0.656168	0.000423989
BIN1	-0.656275	0.000211219
ERFL	-0.656446	9.48e-05
LINC01237	-0.656492	0.000345598
AC004923.4	-0.656902	0.000210724
NXPH3	-0.657427	0.00017639
SHF	-0.657721	2.69e-06
MLLT11	-0.657836	0.000178915
AC145343.1	-0.658242	0.000630374
IVD	-0.658401	7.45e-08
LACTB2-AS1	-0.6586	3.53e-05
PIK3R3	-0.659442	6.44e-07
AC099518.6	-0.6595	0.000783161
PRDM6	-0.660064	0.000353878
HVCN1	-0.660108	2.77e-06
LINC01197	-0.660332	8.27e-06
TFR2	-0.660749	0.000485382
ISLR	-0.660861	0.000972906
AC135506.1	-0.661449	1.63e-05
SLAMF6	-0.661508	0.000948743
CYP7B1	-0.661921	0.000111356
FAM166B	-0.662232	0.000294066
CPXM2	-0.662239	0.000319821
CYFIP2	-0.662263	2.31e-05
FBXL22	-0.662373	5.41e-07
AC012313.9	-0.662525	0.000208336
PKN1	-0.66293	3.32e-07
MYH14	-0.663945	0.000754895
CENPV	-0.664035	0.000198761
IL21R	-0.664142	0.000312679
AC009061.2	-0.66436	1.19e-09
SLC43A1	-0.664391	3.66e-06
AP003774.2	-0.664686	5.02e-05
ZDHHC2	-0.664733	0.000762305
PRKCB	-0.664874	0.000118231
HSPA12B	-0.665039	5.42e-07
AC020910.5	-0.665313	9.69e-07
FRY	-0.665713	7.04e-05
PDCD6IPP2	-0.666021	0.000172495
EDNRB	-0.6661	1.36e-05
ADAMTS7P4	-0.666446	7.19e-05
RAD9B	-0.667047	8.38e-05
AL662844.4	-0.667269	1.87e-06
MOV10L1	-0.667356	0.000636963
DUSP2	-0.66783	2.82e-05
BX539320.1	-0.668005	9.11e-05
MMEL1	-0.668034	0.000978496
SEPTIN1	-0.668583	5.8e-06
ILDR1	-0.669013	0.000539435
CBX7	-0.669059	2.2e-07
DCLK2	-0.669138	2.51e-06
ATP6V1G2	-0.669228	7.37e-05
AC024575.2	-0.669397	1.87e-07
PLCG1-AS1	-0.669402	0.00011989
CYS1	-0.669758	0.000336856
ZNF396	-0.669824	7.86e-07
CYP1B1-AS1	-0.670149	0.000638452
AC004477.1	-0.670265	2.19e-06
ATP6V0E2	-0.670498	0.000118504
HDC	-0.670603	0.000966282
PRR19	-0.670676	1.92e-07
FHIT	-0.671187	6.26e-06
UNC5CL	-0.671539	0.000115193
FAM171A1	-0.671684	0.000302879
PLCL1	-0.671861	1.26e-05
AP005131.6	-0.672035	0.000510354
TMEM25	-0.672087	6.64e-07
NPDC1	-0.672291	1.1e-05
LINC02018	-0.672303	0.000394837
LINC01786	-0.672567	0.000522355
ABCA6	-0.67257	0.00013121
CA11	-0.672861	2.27e-07
CFAP43	-0.673001	0.000969041
CHRNB1	-0.673004	2.13e-06
RHOBTB3	-0.673113	1.6e-05
ADSS1	-0.673157	6.8e-05
U91328.1	-0.673171	1.14e-06
SPIN3	-0.673392	5.27e-05
ZEB1	-0.673811	2.09e-06
GAMT	-0.674312	5.53e-05
OLFML3	-0.674478	0.000145858
PDE5A	-0.674726	1.3e-06
TSSK1A	-0.674797	0.000784802
AC131011.2	-0.674914	0.000743657
CLDN7	-0.676029	0.000105102
LINC00519	-0.676732	0.000508595
MEDAG	-0.677299	0.000516798
DMPK	-0.677499	3.24e-06
AL139125.1	-0.677792	0.000940908
SULF1	-0.677795	0.000432143
AL109917.1	-0.677912	0.000183473
PLAAT3	-0.678034	0.000784773
SLC16A4	-0.678296	2.93e-05
ADAM33	-0.678363	0.000125029
C17orf99	-0.678394	0.000104496
CPA3	-0.678482	0.000853407
TPSG1	-0.678692	0.000775904
SMIM1	-0.678791	0.000164948
SMAD6	-0.67925	1.05e-07
TULP1	-0.679332	5.72e-05
AC007114.2	-0.679374	0.000416198
PTPN7	-0.679531	4.14e-05
SHROOM4	-0.679537	4.09e-06
ZSCAN16	-0.679579	7.95e-08
ZNF682	-0.680058	0.000438912
AL451050.2	-0.680528	0.000165637
AC135178.3	-0.681067	0.000452098
AC020765.2	-0.681331	0.000120732
SHC2	-0.681387	0.000119207
OR2A9P	-0.681403	0.000276798
SIT1	-0.681588	0.00019434
LINC00324	-0.681628	2.2e-10
AC006504.1	-0.681635	0.000473003
ICAM2	-0.681668	2.4e-07
FCGRT	-0.682031	7.66e-11
ZNF578	-0.682271	0.000626193
AC011481.3	-0.682475	0.000990848
CEP250-AS1	-0.682653	8.35e-05
MYO1A	-0.682827	0.000779781
AL157895.2	-0.68291	0.000606929
ZNF626	-0.683052	0.000122987
PPP1R12B	-0.683368	2.03e-06
PARP15	-0.683383	0.00010213
LINC01252	-0.683435	0.000654556
LRRC75A	-0.683486	1.91e-06
RIBC1	-0.683847	6.15e-07
ZBTB18	-0.68409	3.93e-08
AC093535.2	-0.684203	1.95e-05
TTC39C-AS1	-0.685264	0.00028795
ZNF385C	-0.685994	0.000641378
PRICKLE4	-0.686064	0.000198271
FBXL13	-0.686914	0.000108176
AC254633.1	-0.687007	0.000391086
ZIK1	-0.687027	4.71e-06
AP001922.5	-0.687922	0.000874965
AC133552.5	-0.688711	3.29e-05
MIS18A-AS1	-0.688768	7e-05
RCSD1	-0.688867	7.56e-06
PPP1R14A	-0.689078	1.18e-05
TBC1D10C	-0.689924	6.15e-05
LINC02381	-0.690102	4.18e-05
AP001189.3	-0.691056	0.000881105
MEIS3P1	-0.69133	0.000839169
PRR29	-0.691592	8.32e-06
USP6	-0.691619	7.11e-05
IKZF1	-0.691861	6.31e-05
LINC01144	-0.691969	1.96e-06
LMOD1	-0.692152	0.000147789
LRRC37A4P	-0.692882	0.000431495
RGS9	-0.693128	4.25e-05
USP44	-0.693405	0.000726552
ADAMTS5	-0.694101	0.000484635
LINC01515	-0.694368	0.000451082
DPP4	-0.694662	0.000807735
ARMCX3	-0.694888	1.21e-07
ZNF546	-0.694973	5.09e-10
UCP2	-0.695981	1.35e-06
P2RX5	-0.696232	0.000285811
A2M	-0.696707	3.32e-07
ANKRD6	-0.696973	1.55e-05
ZFP14	-0.697022	2.77e-09
DLGAP4-AS1	-0.697105	1.37e-06
MROH8	-0.697692	6.26e-09
PIEZO2	-0.697697	0.000260462
CRIP1	-0.698045	6.73e-06
ADGRB2	-0.699044	2.1e-05
TMEM255A	-0.699372	0.000845113
LINGO3	-0.699423	0.000861703
TPSAB1	-0.699718	0.000193592
COL6A3	-0.700137	0.000516255
GVQW3	-0.700321	4.53e-05
CHRNE	-0.700553	5.5e-05
CSF2RB	-0.700638	5.18e-05
PROCA1	-0.700852	3.67e-08
TNFRSF19	-0.700922	5.63e-05
MGARP	-0.701787	0.000260462
AC012618.3	-0.701793	0.000118143
MEGF11	-0.702533	6.3e-05
AC006254.1	-0.702617	5.93e-05
AC027601.3	-0.702936	0.000474198
C20orf96	-0.70294	9.99e-08
LINC01480	-0.703262	0.000613759
PIM2	-0.704457	5.68e-06
KCTD21-AS1	-0.704458	2.67e-05
AP003498.1	-0.704542	2.35e-05
LRRC6	-0.704882	0.000119609
MRGPRF	-0.704903	7.66e-06
ABCD2	-0.704914	0.000952236
AC005696.1	-0.704922	4.28e-07
COL14A1	-0.70509	0.000193347
CYTL1	-0.705155	7.66e-05
ASB9	-0.705445	2.92e-05
SLC17A9	-0.705812	2.44e-05
DMD	-0.705933	0.000219329
ADORA2A	-0.706211	1.68e-05
TNS1	-0.706517	6.64e-07
FRMPD3	-0.70664	0.000657074
NRG2	-0.706832	0.000879905
ZNF345	-0.706875	7.34e-07
FAXDC2	-0.707654	3.57e-06
RNF157	-0.708162	0.000167331
BEGAIN	-0.70829	0.000151394
RGS9BP	-0.70833	0.000112591
NT5DC4	-0.70836	6.14e-05
TTLL10	-0.708634	0.000897209
LINC02391	-0.708919	0.000879047
IL16	-0.708965	1.14e-06
FBLN5	-0.709109	3.93e-06
SUGT1P4-STRA6LP	-0.709387	0.000323024
COLEC12	-0.709477	0.000178591
SEPTIN7P9	-0.709552	0.000387574
ECT2L	-0.709633	0.000983319
SLC4A11	-0.709775	2.67e-05
ALG1L13P	-0.710132	0.000444897
CD180	-0.710261	3.42e-05
ZNF426-DT	-0.710354	2.75e-05
AL008727.1	-0.710869	0.000625204
LRFN1	-0.710947	2.91e-05
RENBP	-0.710981	6.98e-07
RPS6KL1	-0.710997	0.000164261
Z97055.2	-0.711388	4.56e-05
AC016590.3	-0.711827	4.81e-05
AC087477.2	-0.712293	6.26e-05
DRAIC	-0.712356	0.000918444
GRIN2C	-0.713027	0.000631773
AC007637.1	-0.713117	0.000921874
AL109741.1	-0.713318	5.25e-05
MEIG1	-0.713587	0.000536045
IKZF3	-0.713974	0.000371355
FKBP10	-0.714167	6.21e-05
CACNA1F	-0.714534	4.53e-05
AC106795.2	-0.714613	0.000652564
LDOC1	-0.714699	0.000958516
ZNF569	-0.714705	1.51e-06
ZNF528-AS1	-0.714728	5.42e-05
CHRNA3	-0.714944	0.000844157
PPFIA2	-0.715167	0.000789768
AL158211.5	-0.715327	7.2e-05
DCN	-0.715419	5.15e-05
ZNF358	-0.715681	7.29e-09
NOTCH4	-0.715718	1.14e-09
FAM162B	-0.71574	1.29e-05
AC116036.2	-0.715844	0.000807735
TRBC1	-0.715905	0.000540263
AEBP1	-0.71609	7.11e-05
ZKSCAN7	-0.716365	7.46e-08
TCTEX1D1	-0.716436	2.84e-05
NNT-AS1	-0.71697	6.04e-09
PCDHGA12	-0.717195	0.000288822
LINC01359	-0.717274	0.000435499
SMIM10	-0.717408	3.35e-06
GPR20	-0.717486	0.000864229
LINC01353	-0.717758	2.42e-05
MAGIX	-0.717862	3.79e-09
RAMP2	-0.718479	2.82e-10
GGT7	-0.718658	2.03e-06
TMEM130	-0.718799	0.000211762
EFEMP2	-0.719517	3.42e-06
TDRKH-AS1	-0.719882	4.57e-05
CARD9	-0.719976	4.78e-07
AC126544.1	-0.720171	0.000725098
SMAD9	-0.720369	1.65e-06
KDM2B-DT	-0.720644	0.000177573
LTB	-0.721007	5.65e-05
ZNF93	-0.721435	2.77e-05
CCDC106	-0.72202	1.29e-09
SOX17	-0.722199	4.39e-07
GRM2	-0.722283	2.48e-08
ADAMTS7P1	-0.722306	0.000212868
NPR1	-0.722664	1.96e-06
CD37	-0.723311	6.73e-06
FAM110D	-0.723324	3.14e-07
LINC00663	-0.723327	2.39e-09
NPTX2	-0.723381	0.000438244
TTC25	-0.723564	2.79e-05
ECM2	-0.723756	1.42e-05
FAM71E1	-0.724118	0.00012889
SCARF2	-0.724193	3.92e-05
FAT4	-0.72438	0.000171209
WEE2-AS1	-0.724537	8.64e-07
SALL4	-0.72494	0.000265431
FCHO1	-0.725184	8.64e-06
ZNF483	-0.725626	4.8e-06
ARMH1	-0.725647	4.43e-05
MTMR9LP	-0.725913	3.31e-08
ITM2A	-0.726478	2.39e-06
APLP1	-0.726575	8.27e-05
PLCL2	-0.726699	1.64e-06
CD302	-0.727078	3.44e-08
AC015819.2	-0.727718	0.000718377
AC092375.2	-0.727873	0.000478932
F5	-0.728083	0.000273176
AL590787.1	-0.728348	0.000879905
NR2F1	-0.728436	8.82e-06
ADAMTS9-AS2	-0.728461	0.000172936
[truncated: 3,537 more rows]

## Sheet: LUAD gene rank
Gene_symbol	log2FC (Low Fuz/High Fuz)	adjusted p value
EIF4E1B	3.6747	4.57e-19
G6PC	2.7501	6.84e-11
AC025419.1	2.57715	3.03e-20
TM4SF20	2.48507	3.76e-12
S100A7	2.47489	3.72e-13
UGT1A8	2.4275	5.15e-06
LINC01733	2.38535	1.15e-05
AL139393.2	2.34483	0.000143371
SSX5	2.3099	0.000162614
VGLL2	2.26676	1.2e-06
S100A7A	2.13925	2.99e-05
PSG1	2.12457	0.000367268
SPRR2D	2.10092	1.89e-10
KRT81	2.06545	7.88e-20
PIWIL3	2.02601	1.29e-05
EVX1-AS	2.02235	0.000136148
A2ML1	1.98646	1.88e-17
SPRR2G	1.98631	1.75e-05
ALB	1.98575	7e-11
EEF1DP5	1.95653	2.84e-07
ATP11AUN	1.87725	5.74e-10
IL37	1.87398	2.82e-11
TDRD1	1.83915	2.17e-16
KNG1	1.82153	3.86e-10
AP005901.1	1.76218	0.000602641
LINC00973	1.74504	3.31e-07
TNMD	1.69033	3.94e-07
SPRR2E	1.68377	0.000964311
HNRNPA1P17	1.6742	3.25e-06
LINC00221	1.66519	0.000184094
MYH1	1.66017	6.03e-13
SPINK4	1.63182	4.23e-07
GABRA1	1.63088	0.000744803
AL049775.2	1.61787	0.000215535
GJA3	1.61286	7.45e-17
ACTBP12	1.60237	4.74e-08
SPRR1B	1.5811	4.8e-06
AL355916.1	1.58088	1.3e-18
AC004704.1	1.55515	0.000556596
TEX15	1.53733	3.35e-06
AL353752.1	1.52396	0.000856009
KRT20	1.46429	0.000368045
UPK1B	1.46282	3.96e-05
MUC22	1.44109	1.74e-11
AC008063.1	1.43623	8.5e-07
AC002351.1	1.43201	0.00015409
CALML5	1.42037	0.000686397
ACTL8	1.41318	0.000721092
AGTR2	1.40227	7.95e-07
CDK8P2	1.40061	1.25e-05
SPRR2F	1.39202	0.000374236
AC092490.1	1.38955	1.02e-08
SLC5A7	1.3893	4.14e-06
ACMSD	1.38411	3.12e-11
APOBEC3AP1	1.38384	0.000712654
CALN1	1.36522	2.99e-06
PADI3	1.33587	0.000215535
SYT10	1.33565	0.000728519
PROS2P	1.33176	4.5e-05
UGT2B4	1.31272	3.28e-07
AC006159.2	1.30627	8.62e-05
AC091173.1	1.30363	0.000270215
AC239584.1	1.29551	0.000186132
ANKRD30B	1.28606	7.07e-05
GLP2R	1.28294	5.7e-08
ADCYAP1	1.27956	6.06e-10
IVL	1.24244	3.43e-05
AACSP1	1.23437	1.11e-06
IL1RL1	1.22191	1.43e-09
COX8C	1.18846	4.22e-05
LIPK	1.18753	0.000840756
NR1H4	1.18583	0.000165111
BNC1	1.17581	1.39e-06
MIR3617	1.17375	0.000470573
TDRD9	1.17099	1.1e-08
GUCA2A	1.16401	0.000313254
ASS1P11	1.16264	9.74e-05
LINC02805	1.14648	0.000803257
MAGEA8	1.14359	0.000292082
GABRA2	1.14085	9.52e-05
NAALADL2-AS2	1.13757	0.000362247
CALCR	1.13633	7.23e-09
AC105290.1	1.12965	0.00046355
AC239600.1	1.1221	1.91e-06
LINC01597	1.1204	9.8e-06
AC018816.2	1.11636	1.54e-05
LINC02454	1.11494	0.000126845
RCC2P7	1.10827	0.000438276
AC017048.3	1.10555	0.000647987
AC022148.1	1.10458	3.32e-05
LINC02555	1.10366	1.6e-05
AP001574.1	1.1028	8.25e-08
APOBEC2	1.08945	3.65e-09
EREG	1.08898	9.7e-05
BPIFC	1.07494	0.000302062
ZNF728	1.07351	0.000126777
LINC01204	1.07262	0.000151737
SPTB	1.06853	2.6e-08
HHLA2	1.06573	0.000227492
MAGEC3	1.05974	0.000580738
IPCEF1	1.05827	1.16e-14
C11orf86	1.0553	0.000288655
PCDHA6	1.04852	1e-07
RPE65	1.04645	0.000421939
ABCA12	1.04597	1.67e-09
SERPINB7	1.01551	0.000951418
SUMO1P1	1.01517	3.73e-05
MGAT5B	1.01359	9.47e-08
MYOSLID	1.01253	3.3e-08
C1QTNF1-AS1	1.01023	4.12e-05
IL31RA	1.00655	3.85e-07
HNRNPA1P3	0.998083	0.000392436
AC013451.2	0.995946	1.07e-05
AP000894.2	0.994533	6.19e-05
MYH4	0.99319	0.000848507
CSMD3	0.992392	0.000422808
MBL3P	0.991501	3.82e-05
LINC02683	0.990346	0.000286578
AC093281.2	0.990288	0.000281276
SLC22A11	0.981406	1.37e-05
NSG2	0.980844	0.000215535
CD109	0.9758	4.13e-13
CAPNS2	0.973733	0.000219071
LEP	0.973653	6.34e-05
P2RY4	0.967385	2.49e-08
VSIG1	0.966431	0.00034052
DACH2	0.965635	0.000366851
AC027627.1	0.958603	0.000575457
AC078788.2	0.951344	0.000416584
AC133963.2	0.94793	0.000749133
HLA-P	0.943546	2.84e-05
Z94160.1	0.942829	0.00045133
TENM3-AS1	0.939271	8.87e-07
MYH15	0.93396	3.31e-08
EGOT	0.93154	2.4e-07
XAGE1B	0.921378	0.000260285
PSMC1P11	0.917204	0.000330454
COL22A1	0.914081	3.43e-07
GGT4P	0.912667	6.27e-05
AC124276.2	0.903726	0.000125368
AL596218.1	0.903301	0.000398762
PCDHGA8	0.895663	2.16e-06
AC092162.3	0.887457	0.000232585
AC108751.5	0.885388	4.62e-05
ESR1	0.884656	9.39e-09
SYT12	0.882901	2.45e-05
AC092821.3	0.877941	0.000851257
AC004847.1	0.870133	1.35e-06
MCF2	0.868137	8.06e-05
DCBLD2	0.867711	1.4e-12
RPL6P4	0.866956	0.000198966
IL36G	0.866858	0.000409708
LUCAT1	0.866359	1.1e-05
AL845331.2	0.8663	1.2e-05
LRRC55	0.86189	5.09e-06
DGKB	0.856476	0.000226433
ILDR2	0.855877	1.96e-08
AC112721.1	0.853334	1.92e-05
MT-TM	0.852463	0.000278597
BRINP2	0.851452	0.000257392
LINC00460	0.851304	0.000848272
MYH2	0.85115	1.73e-05
BHMT	0.850475	0.000457906
RSPO1	0.84622	9.89e-06
PCDHGA2	0.84532	2.01e-09
TTLL11-IT1	0.843509	0.00014167
AL445220.1	0.842005	0.000876149
VTN	0.837023	1.12e-05
RN7SKP97	0.835869	1.34e-06
TAF7L	0.831718	0.000199496
IBSP	0.829156	0.000554086
TIMD4	0.82413	2.02e-07
NMNAT2	0.815083	6.13e-05
FOSL1	0.81476	6.28e-06
FAM180A	0.814082	1.65e-08
CREG2	0.813398	9.17e-05
AL138789.1	0.813345	0.000309563
ROR1-AS1	0.812894	1.12e-07
LINC00880	0.811617	5.39e-06
AC234772.2	0.809431	0.000432325
CACNA1E	0.804145	8.83e-06
AP003555.1	0.802348	2.4e-05
XKR5	0.801621	5.54e-05
MKRN4P	0.799955	0.00087318
ITPKA	0.799471	8.34e-05
CDSN	0.798028	0.000359434
AC244517.6	0.796148	3.86e-06
CA1	0.785359	0.000533524
MEG3	0.782977	4.05e-05
SUCNR1	0.776133	1.77e-06
NIPAL4	0.775573	1.88e-05
LINC02015	0.771403	4.47e-05
LINC01088	0.767868	0.00031895
PCDHGB3	0.76155	3.68e-08
NAV3	0.761088	1.06e-08
IGFN1	0.760664	4.93e-05
PCDHB8	0.758283	4.24e-05
NSA2P3	0.756152	0.000118175
BCAT1	0.751609	5.61e-07
F2RL2	0.749672	1.22e-05
ATP8B3	0.746991	5.16e-07
FLRT2	0.74697	3.11e-08
RAB3C	0.742677	0.000158532
AREG	0.742039	0.000243493
KLHL4	0.739271	1.67e-06
SLC2A14	0.730441	6.31e-05
AIM2	0.728678	4.04e-05
F13A1	0.7256	7.52e-07
CILP	0.724448	0.000103303
DPP4-DT	0.722189	0.000207046
AC244517.7	0.721406	5.99e-06
RNU6-26P	0.721157	0.000111127
AC022034.4	0.718513	0.000333937
TCHH	0.713564	2.92e-06
BEAN1	0.711719	1.27e-06
MAP1B	0.707807	1.47e-07
CNOT6LP1	0.706713	5e-05
AL590428.1	0.704499	2.72e-06
PCDHGA4	0.703339	4.9e-06
GPR78	0.702735	8.21e-05
TNC	0.701585	1.52e-05
AC092135.3	0.699856	6.16e-05
AC003973.2	0.697324	0.00079676
SHOC1	0.696917	0.000199778
FLNC	0.696744	0.00014823
G0S2	0.694639	4.46e-06
ITGA2	0.694221	3.15e-07
SCDP1	0.694123	0.000865146
XIRP1	0.693547	0.000144643
OTOGL	0.693347	0.000486033
AC025048.6	0.693143	0.000251707
WFDC13	0.689345	8.8e-05
KCNH7	0.686896	0.000184108
BEND4	0.686753	0.000623157
LINC02458	0.685284	0.000453045
RNU6-638P	0.677916	3.93e-05
DPP4	0.676774	2.18e-05
ARNTL2	0.67327	5.12e-06
GJB2	0.670062	0.000140313
ZNF804A	0.668774	4.02e-07
E2F3P1	0.667309	1.13e-05
ECM1	0.664717	4.61e-05
HTR7	0.662889	2.97e-06
AC115522.1	0.66066	6.06e-06
ZFHX4	0.65276	0.000434616
VGLL3	0.651531	6.46e-07
PCDHGB4	0.650359	0.000373377
AC019117.2	0.647283	0.000883267
MYO1G	0.645852	6.9e-06
MAP7D2	0.641085	0.000758883
PCDHA5	0.639854	0.000250207
CD274	0.636892	4.81e-06
RASSF8	0.635807	5.01e-09
AC083805.1	0.634948	0.000959086
FAM3C2	0.631559	3.28e-09
SPATA46	0.631052	7.29e-06
MSNP1	0.629773	1.99e-05
TIPARP	0.628677	2.17e-08
LRRC15	0.627749	0.000706388
LYPD5	0.627424	5.77e-06
TGFBI	0.625282	9.35e-06
ZDHHC20P1	0.624785	0.0001607
CD163	0.624076	5.58e-07
AL139807.1	0.621131	0.000942667
MET	0.619932	0.000108858
AC022509.3	0.619899	5.36e-05
ELFN2	0.619701	0.000509918
SLC25A18	0.617014	6.67e-06
GNLY	0.614227	0.00045411
DELEC1	0.606158	0.000682461
AC104115.2	0.604965	0.000562243
RPS18P13	0.603794	0.000335123
KIRREL3	0.60071	0.000404577
STAC	0.600704	6.36e-05
ASPH	0.59972	7.84e-07
CD209	0.599215	3.66e-06
VXN	0.593797	0.000299229
AL512785.2	0.593448	9.19e-05
AC010533.1	0.593371	0.000174487
MRC1	0.5918	3.63e-05
AL450992.2	0.590297	0.000824
PCDHGA11	0.587797	2.22e-05
CCL22	0.587602	0.000126366
RGS8	0.587217	0.000981058
ADGRE1	0.586307	0.000164932
INSYN2B	0.585158	0.000942386
LOXL2	0.584063	2.17e-05
AC007750.1	0.582938	2.33e-05
LINC00922	0.581594	0.00088408
AOX1	0.579949	0.000638214
CPNE4	0.579764	0.000811048
CYP4F22	0.579689	9.09e-05
PLAU	0.57637	0.000171796
PAG1	0.571759	1.73e-09
CD300E	0.571222	2.72e-05
CRYBG1	0.570994	2.71e-07
ADAMTSL1	0.570201	0.000365032
TNIK	0.568895	4.28e-06
CREB5	0.564331	5.6e-06
PLXNA4	0.563378	2.73e-05
GFPT2	0.562101	2.99e-06
TENM3	0.559692	0.000422808
PCDHGB8P	0.559183	0.000768384
AP002954.1	0.557836	6.92e-05
ADAM12	0.556955	0.000248042
PCDHGA3	0.556363	0.000311663
BEND6	0.555893	5.99e-05
KLF7-IT1	0.554068	1.31e-05
AC243960.2	0.553947	7.12e-05
CDKL2	0.553223	0.000336055
XPR1	0.551647	3.37e-10
LHFPL2	0.550632	4.76e-13
FN1	0.545886	1.17e-05
ADAMTS16	0.545431	0.000649531
LAMC2	0.543833	0.000670181
PCDHGB2	0.542966	9.37e-05
SLC16A6	0.542	2e-05
AC007728.3	0.541946	0.00014502
CFLAR-AS1	0.540166	1.79e-06
RANBP3L	0.539301	0.00013539
PTX3	0.538875	0.000665766
AC026462.1	0.538044	0.000131436
AC100849.1	0.53471	0.000662041
MAMLD1	0.532975	8.69e-06
AL596244.1	0.532004	6.74e-05
AANAT	0.531235	0.000129205
PCDHGC5	0.525493	0.000265741
SVEP1	0.525065	9.86e-05
AL135818.2	0.521847	7.88e-05
AL121772.1	0.519964	0.000571488
ANKRD55	0.519684	0.00043915
VEGFC	0.519404	0.000167305
CCR8	0.517094	3.8e-05
PLS3-AS1	0.517008	0.000277811
SEMA5A	0.516663	6.12e-05
AC009237.8	0.514946	5.18e-05
ITGA5	0.513005	3.01e-06
CLEC5A	0.511918	0.00014345
AL133415.1	0.511077	0.000517783
SLCO5A1	0.510935	0.000831681
RNU7-45P	0.509111	0.000416724
PLS3	0.506616	2.73e-08
LINC00624	0.505407	0.000368045
DSE	0.504278	4.31e-07
GPRIN1	0.503727	4.11e-06
CDCP1	0.501047	4.15e-06
CD84	0.500667	5.03e-06
Z95152.1	0.49961	0.000192614
FTH1P12	0.499019	0.000207046
PCDHB16	0.498761	0.000191213
MBOAT2	0.49831	6.43e-08
RPL38P5	0.498088	0.000236472
SLC9A7P1	0.498	8.77e-05
GAPDHP60	0.496938	0.000773846
BIRC3	0.495848	0.000227958
SLC9A7	0.493922	1.18e-10
RAB39A	0.493279	0.00068016
CYTH3	0.492971	9e-07
ITGAM	0.492599	1.7e-05
SLC5A3	0.492217	2.25e-07
FAM126A	0.491933	7.22e-07
OSMR	0.49014	1.7e-07
HBEGF	0.490012	2.76e-05
MEFV	0.489824	3.32e-05
OLR1	0.487736	0.000362247
AQP9	0.484278	0.000660322
CYBB	0.484169	4.16e-05
NOTCH2	0.482646	2.11e-11
ANTXR2	0.482619	9.64e-10
CSMD2	0.481546	0.000791427
DNM3	0.481262	0.000151882
SAMD4A	0.480063	7.83e-07
FPR3	0.477148	5.6e-06
RASGRP1	0.475896	3.77e-06
PTAFR	0.475713	6.43e-06
DYSF	0.475689	2.32e-07
SRPX	0.475274	0.000429362
RAB7B	0.475114	0.000647987
TMCC3	0.474193	4.46e-07
EIF4HP1	0.473452	0.000261751
PDZK1	0.472415	0.000152666
SEMA3C	0.471226	6.36e-05
EMB	0.470059	1.61e-05
AC026470.2	0.468505	0.0002301
AL391832.3	0.467087	0.000171345
TCAF2	0.466306	1.08e-06
IDS	0.466	1.92e-09
RIMBP3	0.462177	0.000281848
ITGAV	0.461769	1.24e-08
SLC37A2	0.459717	5.48e-05
DISP2	0.45885	0.000889712
LRRC37A16P	0.458572	1.92e-09
ADAM19	0.458115	2.01e-05
RHBDL2	0.457494	3.22e-05
RNF213	0.454274	8.17e-10
AC093908.1	0.453949	0.000115976
SLC16A2	0.453723	9.79e-06
EMBP1	0.453547	0.000468399
RIMS3	0.453247	3.63e-05
IL2RA	0.453178	0.000556596
CCDC158	0.452837	0.000758883
FKBP5	0.452057	0.000211083
MIR222HG	0.449764	0.000879254
TMOD1	0.449449	0.000167316
COL6A3	0.448822	7.99e-05
REL	0.446721	5.9e-08
PPFIBP1	0.446327	6.22e-09
IL7R	0.444237	0.000240012
SAMD9L	0.44296	3.15e-05
AHNAK	0.442681	3.16e-05
NEURL1B	0.441826	0.000122579
PTPN22	0.440161	7.8e-05
ODCP	0.437371	7.58e-05
DOCK11	0.437172	6.28e-07
DPY19L1	0.436655	2.33e-06
MAN2A1	0.436311	9.59e-11
ATP10A	0.43615	0.000328744
C3AR1	0.436093	5.36e-05
DHFRP1	0.435289	0.000119248
SLCO2B1	0.434039	6.85e-05
BNC2	0.433219	0.000159283
CMKLR1	0.433077	8.09e-05
CTH	0.432878	3.72e-05
AF201337.1	0.432204	5.99e-06
SRGAP2D	0.429843	0.000821832
EPB41L3	0.429833	7.74e-05
GPR183	0.429784	0.000270679
ZBED6	0.429781	5.96e-05
ICAM1	0.429708	0.000411033
GRIN3A	0.429246	8.02e-05
NLRP3	0.427891	0.000102784
PIEZO2	0.427457	0.000441335
OGFRL1	0.427355	8.48e-08
FCGR2A	0.426586	8.47e-06
NEDD4	0.425508	1.68e-07
AC132219.2	0.425213	9.42e-06
NOS1AP	0.424917	2.5e-05
TCAF1P1	0.424246	1.84e-05
ETS1	0.424228	1.5e-07
DDX60	0.423234	2.58e-05
KDR	0.421268	0.000738358
HK2	0.42053	0.000159283
AL008726.1	0.419447	0.000487411
COL8A1	0.418045	0.000443547
TSC22D2	0.417909	1.44e-07
ST8SIA1	0.417027	0.000614094
CDH11	0.416473	0.000238224
KRAS	0.415859	1.68e-07
MYOF	0.415838	2.95e-06
P2RX7	0.415648	9.39e-05
ABCA1	0.41374	9.92e-07
NDRG1	0.413424	7.74e-05
YWHAZP2	0.412396	0.000345902
MYBL1	0.411101	0.000351586
ZFPM2	0.410869	0.000108386
AC020763.3	0.409689	7.15e-05
DPYD	0.408795	8.93e-05
PCDHB10	0.408417	0.000335401
RAPH1	0.405552	6.81e-06
FYB1	0.4042	0.000297474
MICB	0.404149	4.59e-05
PCDHGA6	0.403276	0.000117179
KIRREL1	0.403045	1.36e-05
AL627402.1	0.402852	2.9e-05
FBN1	0.402827	0.000846907
DCBLD1	0.402184	7.98e-06
DLG2	0.400158	0.000125873
AP000357.1	0.398629	0.000855393
VDR	0.398262	7.76e-06
EMP1	0.398064	0.000128227
HIF1A	0.397849	2.69e-07
PRKCA	0.396368	0.000503654
PCDHB15	0.395853	0.000600282
ZNF521	0.395185	0.000943079
ANXA2P2	0.394795	0.000363702
FILIP1L	0.39475	0.000145264
RN7SL138P	0.392919	0.000269169
NRP2	0.392884	0.000175925
RASAL2	0.392458	3.38e-09
OSGIN2	0.392321	2.17e-08
SACS	0.392224	2.37e-06
CD44	0.391282	1.87e-05
TRIM34	0.390612	1.33e-05
SMURF2	0.390556	1.23e-07
JCAD	0.390195	7.41e-05
RASSF8-AS1	0.389769	0.00014984
IL27RA	0.389184	5.28e-05
LONRF3	0.387599	1.56e-05
CEMIP2	0.386204	1.87e-08
SLFN12L	0.38613	0.000318323
RNF19A	0.386001	1.15e-06
TIMP2	0.385605	1.53e-05
FAM3C	0.384444	7.43e-05
SLFN5	0.383561	3.31e-07
AL133371.2	0.383397	0.000977181
IL1RAP	0.383212	0.000202205
PLXNC1	0.381704	1.07e-05
AC026356.1	0.381428	2.48e-05
CSF1R	0.380909	0.000333994
MAN1A1	0.380746	2.13e-05
AC093535.2	0.380676	1.46e-05
RESF1	0.380222	2.45e-07
HNRNPA1P21	0.378676	0.000759371
C5AR1	0.378375	0.000347766
NRP1	0.377793	4.1e-06
ITPR2	0.377356	2.89e-05
S100A10	0.376067	8.68e-05
SMPDL3A	0.374746	0.000711063
TRIM14	0.374488	7.25e-09
DENND5B	0.373852	0.000344044
ITGA3	0.37285	0.00073085
SLC36A1	0.371888	8.24e-08
TPBGL	0.371666	0.000510642
CRYBG3	0.370944	1.06e-05
TANC2	0.370867	3.15e-06
HDX	0.370748	8.54e-05
MSN	0.370493	1.88e-07
RPL4P6	0.36988	5.48e-05
YWHAZP5	0.369853	5.86e-05
RASA1	0.368296	1.26e-09
WNK1	0.367164	4.81e-07
ANXA2P1	0.367033	0.000111453
LRRC37A15P	0.366915	0.000784726
HLA-H	0.366486	0.000513525
ARHGAP29	0.364171	0.000116132
FNIP2	0.364137	0.000144163
DDR2	0.363384	0.000475095
MDFIC	0.362514	3.12e-05
DOCK2	0.362301	0.000325514
MILR1	0.361628	0.000980879
C1orf226	0.359823	0.000242649
IRAK2	0.359766	0.000439441
IFI16	0.35971	0.000464176
PFKFB3	0.359094	0.000242649
RALGPS2	0.358653	2.8e-06
VCL	0.358645	5.16e-08
KLHL5	0.35847	3.16e-05
ANO6	0.356806	3.9e-10
CDC42BPA	0.356292	0.000236507
HRH1	0.353904	1.45e-05
AC018628.2	0.353278	0.000959086
IFIH1	0.352327	4.61e-05
MPEG1	0.352306	0.000860719
AC005332.6	0.351414	1.47e-06
MOB3B	0.351328	0.000281276
PIP4K2A	0.34857	1.11e-07
DAB2	0.348508	6.67e-05
CHST11	0.348326	0.000439441
ZNF462	0.347867	0.00083718
PALLD	0.34774	0.000101649
ELK3	0.347442	4.99e-06
LINC00674	0.346279	1.82e-05
PLXDC2	0.346265	0.000192569
NCKAP1L	0.345694	0.000717834
TICAM2	0.343763	0.000286532
AL671883.2	0.343664	0.000457906
OAS3	0.342237	0.000790079
BHLHE40	0.341521	0.000194088
SLC8A1	0.341429	0.000128278
SH2B3	0.340368	3.88e-07
LYST	0.338816	1.05e-06
ZNF185	0.337267	0.000333007
APOL6	0.336058	7.25e-06
HEG1	0.335659	0.000533579
MID2	0.335186	1.33e-05
BMP2K	0.333207	5.95e-07
RPS6KA3	0.332109	3.69e-08
PON2	0.33193	0.000242472
P2RY1	0.331236	0.000659385
ELF4	0.330244	1.81e-06
SPRED1	0.329944	1.77e-05
GNG12	0.328687	2.61e-05
CMAS	0.32809	3.25e-05
GBE1	0.327886	4.27e-06
MPP1	0.327785	0.000317327
ZEB2	0.327097	0.000129144
FLNA	0.326934	0.000421939
TMOD2	0.325967	4.56e-05
RECQL	0.323858	3.04e-05
ALG1L6P	0.323732	0.000790227
SDC3	0.323335	2.31e-05
JAK1	0.322618	1.64e-11
HLA-B	0.322151	0.000938109
RIPK2	0.321014	3.16e-05
SETD7	0.320763	1.13e-07
MAFB	0.320193	0.000709622
ZNHIT6	0.319723	1.88e-06
ABL2	0.319526	7.81e-09
ATP2B4	0.318895	0.000230653
STAT1	0.31876	0.000491644
MYO5A	0.317938	7.69e-06
CD93	0.316984	0.000983374
LAMP2	0.316142	2.64e-07
AC000403.1	0.315558	0.00089146
HIP1	0.315517	0.00053806
SMURF1	0.314545	5.2e-07
SH3KBP1	0.314442	1.99e-06
SOD2	0.313287	0.000995605
FGD6	0.31321	0.000156652
BICD1	0.313189	0.000188832
DDX60L	0.310567	0.000452928
FNDC3B	0.30996	7.01e-07
PRPS1P2	0.309367	0.000108858
NRIP1	0.308159	0.000158724
IGF2R	0.305804	6.36e-06
CCDC88A	0.305299	0.000142464
LUZP1	0.305206	1.23e-06
BRPF3	0.304077	3.6e-06
KLF7	0.30291	4.29e-06
YY2	0.302803	4.53e-05
RBMS2P1	0.302788	0.000569762
ANKRD50	0.302424	3.49e-05
ATP7A	0.301259	7.06e-07
BCL10	0.300701	4.1e-06
ARSB	0.300263	1.42e-07
STARD8	0.300072	0.000723929
AC019080.1	0.299221	5.2e-06
P4HA2	0.29875	5.67e-05
TRANK1	0.297968	0.000118809
EPB41L2	0.297959	0.000629383
AFAP1L1	0.296936	0.000673436
PTBP3	0.296629	1.06e-09
HERC3	0.29623	5.57e-06
FRMD4B	0.2961	2.62e-05
FKTN	0.295992	8e-11
NPEPPS	0.295939	1.18e-09
CMTM1	0.295771	0.000508608
CORO1C	0.29554	4.97e-06
KIF2A	0.295155	8.28e-06
AC011497.2	0.294793	0.000577372
MAP2K4P1	0.294516	0.000351419
LIMK1	0.294462	0.000191757
FRK	0.293724	0.000113508
PDLIM5	0.293304	0.000240058
CHM	0.292806	1.83e-07
RALB	0.292648	1.49e-06
TAP2	0.292084	0.000536004
CHD1	0.291849	1.83e-08
STK10	0.291796	3.91e-05
PDZD8	0.289694	9.85e-05
RHBDF2	0.289035	8.53e-05
PDP1	0.288478	0.000609882
GNA13	0.288187	3.29e-08
FLI1	0.2879	0.000859356
ATP10D	0.287661	0.000224697
ASCC3	0.287588	2.05e-07
TMEM131L	0.287519	8.57e-05
EDEM1	0.2875	9.59e-05
LMBRD2	0.286121	8.41e-05
ZFP36L1	0.285723	0.000508097
FRYL	0.284554	4.88e-08
TNS3	0.283761	7.74e-05
PRRC2C	0.28299	7.01e-07
FER	0.282906	3.28e-06
CD2AP	0.282746	1.45e-05
MAP3K1	0.282613	5.4e-07
NBN	0.281316	1.95e-06
SPATS2L	0.281293	0.000444713
MAPK9	0.281253	3.62e-07
CTSB	0.281242	0.000596555
SLC30A1	0.280878	7.1e-05
SFT2D2	0.280681	1.42e-07
SRGAP2B	0.27981	0.00027012
YWHAZP4	0.279633	0.000240657
ATP11C	0.279011	7.69e-05
SLC9A6	0.278973	1.82e-07
SKAP2	0.278666	0.000365687
LMTK2	0.278664	0.00024153
ZEB1	0.278511	0.000726373
FRMD4A	0.278339	0.000132785
MED13	0.278121	9.27e-07
IFNAR2	0.276574	1.08e-05
EXT1	0.275623	6.54e-06
ATXN7	0.275396	6.21e-07
TGFBR1	0.274595	0.000315763
SRGAP2	0.273751	6.06e-06
CTSO	0.271815	0.000327905
CAST	0.271037	3.94e-07
ITPRIPL2	0.270003	5e-05
AAK1	0.269677	4.8e-07
SPAG9	0.268382	2.45e-05
LYN	0.267347	0.000132089
SH3D19	0.26617	1.53e-06
ELK4	0.265056	1.6e-07
CAPN2	0.264964	8.82e-05
SOAT1	0.263147	2.5e-06
NBPF9	0.263087	0.000507747
PLEKHA8P1	0.262943	0.00016949
DIAPH1	0.262324	4.78e-08
LRRC8C	0.262194	0.000723272
FBXW11	0.26153	2.11e-07
PLBD2	0.260981	7.5e-06
PIK3CB	0.260424	1.09e-05
CTDSP2	0.260259	4.37e-06
FAM135A	0.258823	0.000371727
AFF1	0.258337	7.08e-06
TBC1D4	0.258123	0.000374236
TMPPE	0.257178	0.000307821
CCDC47	0.256371	3.31e-07
SRGAP2C	0.256349	7.45e-05
MED14	0.255732	3.79e-07
ZSWIM6	0.255656	1.14e-05
PARP14	0.255491	8.52e-05
SLC25A43	0.25506	3.66e-05
CTTNBP2NL	0.254993	1.5e-06
NBPF10	0.254674	0.000799496
CTNNB1	0.254671	0.000141116
SLC35D1	0.25462	8.46e-06
BCL9	0.254398	0.000683756
RAD23B	0.253625	1.34e-07
RAP2B	0.253533	0.000307035
CLTC	0.253301	2.92e-08
RUNX1	0.253285	4.29e-05
DIAPH2	0.252972	0.000591066
USP32	0.252092	1.4e-05
EML4	0.251405	9.41e-05
FKBP15	0.251374	6.05e-09
FEM1C	0.250313	8.28e-06
SPRED2	0.249858	0.000254947
TMEM245	0.249789	0.000369251
MAP4	0.249749	4.23e-07
SSH1	0.249109	3.66e-05
NFKB1	0.249073	1.75e-06
HIVEP2	0.248546	0.000204857
LASP1	0.247791	1.02e-05
EXOC6B	0.247713	2.9e-05
PPP1R12A	0.247122	4.32e-07
SVIL	0.244744	0.000924638
TPP1	0.244624	5.53e-06
MFAP3	0.244058	0.000309337
FMNL3	0.24381	0.00022158
IL13RA1	0.243696	1.97e-05
IPO8	0.243685	8.24e-06
PTPRK	0.243205	0.000330142
GEMIN5	0.242842	7.59e-07
HUWE1	0.24264	5.69e-05
GOLGA4	0.242486	6.29e-05
CFLAR	0.241951	0.000238336
SLC39A10	0.241257	0.000483063
DENND4C	0.241139	0.000125233
SERTAD2	0.240979	9.99e-05
IQGAP1	0.240639	1.23e-05
USP25	0.239789	2.89e-05
CSGALNACT2	0.239691	3.11e-06
SH3PXD2A	0.239394	0.00060887
CPEB4	0.238223	0.00021098
NUFIP2	0.23784	4.45e-08
FAF2	0.237465	1.09e-07
STX17	0.237353	1.04e-07
CNOT1	0.237264	1.29e-05
CBL	0.237232	0.000325411
DTX3L	0.235671	5.12e-05
MCL1	0.235635	4.2e-05
ALKBH8	0.235575	0.000214848
FAM120A	0.235397	2.27e-07
TMEM106A	0.23525	0.00015019
TGOLN2	0.234978	8.04e-06
CLOCK	0.23455	3.44e-05
DCUN1D3	0.23329	0.000516277
NIPA1	0.232786	0.000142658
JOSD1	0.232777	2.43e-05
ZC3HAV1	0.232556	1.41e-07
AP2B1	0.232351	3e-05
AVL9	0.232286	5.59e-05
MKLN1	0.232201	1.61e-06
LPCAT3	0.232201	0.000694632
SDCBP	0.231954	6.19e-05
ZBTB43	0.231825	6.65e-05
DIP2B	0.231824	0.000136174
KLF11	0.231114	0.000784726
CASK	0.230923	0.00029749
AFF4	0.230717	1.88e-05
ECPAS	0.230279	3.83e-06
HPS3	0.230252	9.52e-05
RBM41	0.230133	6.35e-06
IPPK	0.229852	0.000328412
TCAF1	0.228382	0.000269803
PANK3	0.228	1.77e-05
CDK12	0.22734	0.000110675
SYNJ1	0.227304	0.000157849
RC3H2	0.225394	1.36e-05
XIAP	0.225343	7.48e-08
QKI	0.224631	0.000320377
RIC1	0.224069	8.09e-05
ACTR2	0.22386	6.43e-08
EIF2AK2	0.22357	5.43e-05
CTNND1	0.223489	1.61e-05
SUCO	0.222939	2.11e-05
MBTPS2	0.222937	6.03e-05
TUT7	0.222574	1.1e-05
RYBP	0.222321	2.06e-06
CBX5	0.222307	0.000791297
CAB39	0.221544	4.95e-06
ASH1L	0.221121	0.000757054
CLCN3	0.221117	0.000294672
TOP1	0.220947	0.00029742
WASF2	0.220331	4.9e-05
DNAJC13	0.220128	1.02e-05
TRIP12	0.220019	8.19e-07
OXSR1	0.218456	2.53e-07
ENTPD5	0.21839	0.000678924
SLK	0.218389	0.000688258
GUF1	0.218322	1.24e-05
APOOL	0.218263	2.02e-05
GPR107	0.217837	2.36e-06
CLIP1	0.217758	0.00079676
NF1	0.217711	0.000299693
PTAR1	0.217619	8.33e-05
USP53	0.216589	0.0006921
CANX	0.215975	0.000134586
WASHC5	0.215394	0.000320303
SETX	0.214906	4.45e-06
LARP1	0.214454	0.000236472
BBX	0.214427	0.00020795
YWHAG	0.21423	0.000446618
PANX1	0.21339	0.000863151
EXOC8	0.213193	1.25e-05
ACBD3	0.21286	2.96e-05
ZNFX1	0.212767	0.000457906
PICALM	0.212528	1.31e-06
RTN4	0.212015	2.78e-05
MFSD1	0.211852	8.75e-05
SLMAP	0.211591	1.61e-05
SEC24A	0.211463	0.000173432
ADAR	0.21124	3.49e-05
UHRF1BP1	0.2106	0.000651158
RAB11FIP5	0.210461	0.000721215
MBNL1	0.210225	0.000485572
TMEM43	0.210047	0.000373712
ATF7IP	0.209641	8.81e-05
USP9X	0.209309	5.3e-05
PRKAR2A	0.209269	3.13e-05
BOD1L1	0.208907	0.000521887
LTN1	0.208891	2.8e-05
PPP3CA	0.208826	0.000498953
PTPN11	0.208609	0.000372067
ATP11B	0.2086	0.000741922
STRN	0.208536	3.62e-05
TLN1	0.208428	0.000316736
EEA1	0.208309	0.000238336
RFFL	0.208062	0.00068349
TAOK3	0.208013	0.000276854
BDP1	0.207605	0.000351817
SSH2	0.207249	0.000101157
HELZ	0.206704	4.68e-05
FOXJ2	0.206366	3.78e-05
ARHGEF3	0.205998	0.000210592
ATL3	0.205817	5.34e-05
UBQLN1	0.205262	2.59e-06
PTPN12	0.205225	1.63e-05
ATRX	0.204906	0.000228575
SCARB2	0.203882	7.59e-05
ETV3	0.203803	0.00018628
WDFY1	0.203643	3.89e-05
PHF6	0.203025	0.000434616
ATXN1	0.202955	0.000222462
CDV3	0.202921	6.01e-05
NEK6	0.2029	0.000685611
CCNYL1	0.202758	0.000865146
WDR36	0.202584	8.69e-06
DYNC1LI2	0.202361	0.000117999
ETFBKMT	0.202252	0.000729447
TJP1	0.202084	0.00082841
SPTAN1	0.201963	0.000195134
LNPEP	0.201745	9.44e-05
ZBTB38	0.201434	0.000514938
CERT1	0.200335	0.000797693
LSM11	0.200206	8.52e-05
FBXO28	0.200153	1.62e-05
PATL1	0.199821	0.000276555
EDEM3	0.199495	0.000847534
OCRL	0.198865	8.42e-05
TBC1D5	0.19846	0.000222954
NSD1	0.198044	0.000279797
WIPF2	0.197751	5.43e-05
NSF	0.196377	0.000158605
UHMK1	0.196046	0.000386423
DCAF7	0.19574	1.78e-05
NEDD1	0.195713	0.000376869
UTP25	0.195396	0.000319982
TRAPPC11	0.195131	2.81e-07
IARS1	0.194844	0.000374236
ENOX2	0.194392	0.000165055
SYNRG	0.194084	3e-05
SERINC1	0.191588	0.000169079
ACVR1	0.191081	0.000362773
ANKRD28	0.190472	0.000629292
FNIP1	0.190079	4.41e-05
CEP350	0.190037	8.15e-05
RASA2	0.190018	0.000372067
FARP2	0.189864	0.000669165
UBE3C	0.189746	0.00011816
PCNX1	0.189343	0.000487157
TAOK1	0.189154	0.000109957
CDC27	0.188885	2.92e-05
MFSD11	0.188799	0.000145027
SAMD8	0.188626	0.0001095
SNTB2	0.188262	0.000413093
PIK3CA	0.188154	0.000428152
ZFP91	0.187907	6.97e-06
CYLD	0.187683	0.000818706
CARNMT1	0.186665	0.000297496
DENND5A	0.186614	0.000131786
RBMS1	0.186384	0.000278754
VRK2	0.186143	0.000864299
LRRFIP1	0.186089	0.000585676
THOC2	0.185617	0.00065603
MYD88	0.185589	0.000528715
G3BP2	0.185538	0.000327304
DYNLL2	0.185493	0.000931726
DCP1A	0.18441	2.73e-05
WASHC4	0.184223	0.000102784
HPS5	0.183618	0.000554086
KPNB1	0.183202	0.000409708
POLK	0.182987	0.000973489
UBTD2	0.182563	0.000522047
SON	0.182417	4.79e-05
TPM3	0.182033	0.000214849
AATF	0.181989	0.000350103
SMC5	0.181971	0.000576397
UBN1	0.1811	0.000286578
STIM1	0.180999	0.000556596
UBQLN2	0.180807	8.32e-05
ANKRD13C	0.180492	0.000198819
GIT2	0.180394	1.7e-05
N4BP1	0.179897	8.79e-05
WDFY3	0.179575	0.000740631
SH3GLB1	0.17769	4.1e-05
OTUD4	0.176868	0.000157849
G3BP1	0.176793	4.25e-05
VEZT	0.176329	0.000616356
RLIM	0.176061	5.5e-05
RAB14	0.175989	2.8e-05
MAPK14	0.174147	3.68e-05
ATF6	0.173815	0.000276133
RHBDD1	0.173668	8.33e-06
STX6	0.173256	8.25e-05
GRB2	0.172843	2.47e-06
ARF3	0.172501	0.000300331
FEZ2	0.172454	0.000372067
TASOR	0.172398	1.83e-05
TAB3	0.172107	0.000593525
ATP6V1C1	0.171839	0.000843781
TP53BP2	0.17011	0.000756331
FUBP3	0.169899	1.43e-05
SLC35F6	0.168998	0.000768319
HTATSF1	0.168718	0.000690491
DCAF1	0.168587	0.000116218
SCYL2	0.167649	0.000765932
FAM20B	0.167548	0.000424011
APPL1	0.167435	0.000210903
C16orf72	0.165008	7.94e-05
ZDHHC5	0.164627	5.32e-06
STK4	0.164465	0.000915647
AP3M1	0.163991	0.000179925
MAML1	0.163365	0.000590105
NPLOC4	0.16309	0.00059938
CDK17	0.162929	0.000638992
ESYT1	0.161218	0.000671842
KLHL20	0.160982	0.000625906
ZNF654	0.160545	0.000895696
PDS5A	0.160447	0.000840756
TRIM38	0.160381	0.000630269
AP4E1	0.160033	0.000972547
GAPVD1	0.158765	0.000918688
SLAIN2	0.158173	0.000254028
ITCH	0.158145	0.000881492
CUL4B	0.158063	0.00055816
MORC3	0.15799	0.000202354
UBE2Z	0.154413	0.000102902
PRRC1	0.153597	0.000841538
SRP68	0.15173	0.000252327
RAB3GAP2	0.151596	0.000784307
KCTD10	0.151291	7.01e-05
GOSR1	0.150648	0.000256655
PWWP2A	0.150616	0.00079414
SEC24B	0.149191	0.000400773
RNF20	0.147979	0.000590671
NSRP1	0.14686	0.000700185
EIF4H	0.143724	0.000965257
PDCD6IP	0.138689	0.000588434
RAB3GAP1	0.137715	0.00061936
MAP3K2	0.136729	0.000140313
WDR26	0.133365	0.000671849
CREB1	0.124724	0.000717045
GGNBP2	0.108273	0.00068215
ZNF207	0.0993334	0.000782998
NRF1	-0.101451	0.000533026
EIF2B4	-0.145059	0.000178391
VRK3	-0.151014	0.000157283
VPS16	-0.151412	0.000965277
ILKAP	-0.155692	0.000248046
MTFR1L	-0.155814	0.000253803
CD2BP2	-0.156425	8.84e-05
AAAS	-0.157504	0.000637109
CLK3	-0.15814	0.000980994
LCMT1	-0.159303	0.000268456
MUS81	-0.160489	0.000899663
TMEM222	-0.164019	0.000507526
SGTA	-0.164534	0.000380402
UBE2J2	-0.164655	0.000462862
DEF8	-0.169008	0.000567168
BABAM1	-0.170019	0.000702197
ELOF1	-0.170724	0.000500093
WDR83OS	-0.171463	0.000439441
MRPL20	-0.17164	0.000534205
SLC35C2	-0.172484	0.000139685
MCRS1	-0.172499	0.000167715
TRIR	-0.172557	0.000667304
PAF1	-0.173255	0.000405809
ELP6	-0.174389	0.000278212
ORC4	-0.175481	0.000609055
SENP3	-0.175505	0.000103583
GPANK1	-0.175561	0.000293289
GLRX5	-0.175565	0.000865504
DERL2	-0.175964	0.000687666
NIF3L1	-0.176451	0.000797005
FAM200B	-0.176897	0.000584571
UBXN1	-0.177036	0.000157849
POLL	-0.177433	1.92e-05
C2orf49	-0.178181	6.29e-05
METTL22	-0.178592	0.00040812
SIRT5	-0.179375	0.000264207
PIP4P1	-0.179707	0.000116731
MED16	-0.179935	0.000950612
INTS11	-0.180061	0.000117179
DHPS	-0.180229	0.000135639
FANCF	-0.180389	0.000503679
WRAP73	-0.182056	0.000101491
R3HCC1	-0.183757	0.000372067
C2orf68	-0.184363	0.000402181
VCPKMT	-0.18531	0.000740631
ANKRD49	-0.185355	0.000462497
ARFIP2	-0.185647	0.000890157
TECR	-0.1863	0.000449022
MRPS31	-0.186656	6.33e-05
ERCC2	-0.186774	0.000944138
ERGIC3	-0.186796	0.000283377
ZNF3	-0.187239	0.000391232
IDH3B	-0.187932	0.000142789
DMAC2	-0.188367	0.000136566
ZNF480	-0.188375	0.000102961
JMJD4	-0.188666	0.000811048
PCIF1	-0.189201	2.88e-06
ANAPC16	-0.18936	0.000981315
CLPP	-0.189368	0.000887142
TEX264	-0.189381	0.000828846
APBA3	-0.18974	0.000372067
STK16	-0.189826	0.000565707
FAIM	-0.190221	0.000590105
TIMM23	-0.190695	0.000623493
TMEM18	-0.19117	0.00058916
RNF167	-0.191279	1.12e-05
PYM1	-0.191911	0.000419269
MYCBP	-0.192348	0.00031873
CAMTA1	-0.192349	0.000347165
SRA1	-0.192572	0.000972921
NDUFV1	-0.193079	8.99e-05
MPLKIP	-0.193173	0.000845083
FAM204A	-0.193794	0.000427717
EIF3J-DT	-0.193977	0.000429821
TMEM216	-0.19398	0.000193116
NAPA	-0.19408	2.2e-05
RALY	-0.194615	4.89e-05
SUCLG1	-0.194873	0.000390178
CCDC9	-0.19576	0.000850454
OTUB1	-0.195771	1.25e-05
SNX5	-0.196033	5.48e-05
ATG4B	-0.197042	0.00011131
CDIPT	-0.197542	2.17e-05
CNPY3	-0.197579	8.06e-05
ZCCHC3	-0.197755	8.32e-05
MRPS11	-0.197873	0.000296152
MCAT	-0.198437	0.000151735
MAZ	-0.198643	0.000467803
STRN4	-0.198681	0.000120682
MOCS3	-0.199175	0.000119686
TTC28-AS1	-0.199427	0.000391152
TUSC2	-0.199769	1.56e-05
MRPL2	-0.199992	0.000977181
HIRIP3	-0.200087	0.000925165
SMIM12	-0.200254	0.000167039
E4F1	-0.201099	0.000554086
CFAP36	-0.201238	0.000278212
PEX14	-0.201471	9.79e-06
GPR137	-0.201535	0.000167294
IMMP1L	-0.201697	0.000140887
TMEM183A	-0.202046	0.000806464
ZNF324	-0.202061	1.36e-05
SRP14	-0.202156	3.25e-05
GRWD1	-0.202318	1.21e-05
GMPR2	-0.202392	5.38e-05
TIMM44	-0.202447	4.22e-05
MKKS	-0.202463	0.000855185
ZNF324B	-0.202556	0.000114497
INO80E	-0.20306	0.000171868
RPUSD2	-0.20309	6.18e-05
TSSC4	-0.203127	0.000105574
HSD17B10	-0.203404	0.000556481
ERVK3-1	-0.203408	2.73e-05
CNOT3	-0.203618	3.88e-05
ECSIT	-0.2039	0.000685469
KDM8	-0.20437	3.44e-05
EXOSC8	-0.204724	0.000602433
U2AF2	-0.204939	1.54e-06
THYN1	-0.205199	0.000828362
SWSAP1	-0.206337	0.000278867
SAP18	-0.206349	0.00035331
PEPD	-0.2064	0.000653246
LZTFL1	-0.206487	0.00041514
SDHAF2	-0.206644	3.81e-05
WDR19	-0.206745	0.000895412
TMEM230	-0.206772	0.000224802
TXN2	-0.206784	0.000365687
ABHD17A	-0.20721	0.000234509
MIIP	-0.207277	0.00073085
ING4	-0.207614	0.000895
NFU1	-0.20777	0.000849565
DEDD2	-0.208189	0.000139339
BRMS1	-0.208319	3.69e-05
CCDC12	-0.208562	0.000200015
DYNLL1	-0.208671	0.000176424
RPP38	-0.2088	2.24e-05
CUEDC2	-0.208949	2.74e-06
MRPL18	-0.208951	0.000234176
C17orf75	-0.208977	0.000142658
PEBP1	-0.209399	0.000586586
PSMG4	-0.209743	0.000357398
BCDIN3D	-0.210531	0.00019223
MRPL17	-0.210593	0.000789141
EXOSC1	-0.210656	7.07e-06
SERGEF	-0.21067	0.000340519
TMEM218	-0.210734	0.000352868
SIRT6	-0.210896	0.000153386
FBL	-0.211005	0.000591632
SPRYD4	-0.211024	0.000281705
URI1	-0.211174	0.000662012
UBALD1	-0.211181	0.00056025
NDUFS7	-0.211498	0.0002779
BORCS8	-0.211526	6.86e-05
STX8	-0.212449	0.000379802
COQ4	-0.212759	0.000118923
MIEF2	-0.212988	0.000458577
REPIN1	-0.213124	0.000174737
PPP2R1A	-0.213148	1.15e-07
PSMC4	-0.21347	0.000256075
KLHDC2	-0.213524	0.000691034
CHMP4A	-0.214269	0.000685611
MKS1	-0.214433	8.03e-06
WDR45	-0.214677	9.76e-06
PPP1R37	-0.214729	0.000188257
TAF10	-0.214831	2.08e-05
CCDC130	-0.214881	0.000430134
ECHS1	-0.214975	0.000147956
XRCC1	-0.21527	9.89e-06
SURF1	-0.215326	0.000515502
HDHD5	-0.215481	0.000235512
DPM1	-0.215626	0.000243699
ZNF768	-0.215899	0.000341461
ERF	-0.216423	0.000296323
TMEM258	-0.216477	0.0001672
ZNF232	-0.216831	0.000947296
CMC1	-0.216948	0.000361378
KIF22	-0.216976	0.000981933
TUT1	-0.217456	0.000137439
ELP2	-0.218203	0.000308688
MED29	-0.218222	4e-06
MPV17L2	-0.218244	0.00013635
SLC25A39	-0.218251	0.000428826
ARMC5	-0.218263	0.000982175
BSCL2	-0.218275	3.9e-05
MRPL53	-0.218389	0.000139339
RFNG	-0.218598	0.000122365
SERP1	-0.218739	0.000207143
FLYWCH2	-0.21874	0.000114219
ACTR1B	-0.21876	2.7e-06
POMGNT2	-0.218921	0.000309192
C12orf73	-0.21922	0.000658632
VPS28	-0.219546	0.000782998
PPIE	-0.22025	3.81e-06
DMAP1	-0.220504	0.000170398
ACYP2	-0.220609	0.000686623
DCTN3	-0.220705	0.00015019
DNAJC4	-0.220775	0.000126509
SNRNP25	-0.220842	0.000987421
EID2	-0.221043	3.67e-05
ZNF586	-0.221462	3.96e-05
EGLN2	-0.221592	0.000234374
GGA1	-0.221716	7.99e-05
C19orf47	-0.222441	6.43e-05
POLD1	-0.22248	0.00058093
PIGBOS1	-0.222657	0.00018729
APEX1	-0.22305	0.00016882
MEA1	-0.22305	9.54e-05
ERI3	-0.223249	3.75e-06
TMEM129	-0.22349	0.000281276
TMEM134	-0.223754	0.00050197
CXXC1	-0.223808	0.00015699
TMEM260	-0.224508	0.000275909
SCAF1	-0.224693	5.19e-05
LINC01560	-0.225234	0.000370706
TRAPPC1	-0.225359	4.6e-05
FOXRED1	-0.225739	0.00011384
MCEE	-0.226303	0.000585348
RWDD2A	-0.226401	0.000162919
PREB	-0.226796	1.57e-06
RNF25	-0.22684	3.38e-08
ZNF784	-0.227042	0.000373377
WDR18	-0.227066	0.000865615
MANBAL	-0.227135	1.62e-05
LIG1	-0.227161	0.000314045
SETMAR	-0.227179	2.87e-05
ABHD8	-0.227474	0.000202398
LIMK2	-0.227482	0.000910361
RPGRIP1L	-0.227609	0.000278582
PAXX	-0.228264	0.000998993
PRR14	-0.228464	6.02e-07
ZSWIM7	-0.228728	0.0002452
TTC5	-0.22947	0.000349426
TMEM179B	-0.229783	7.93e-05
FKRP	-0.229985	1.32e-05
SPATA24	-0.230125	0.000491644
PRMT7	-0.23013	4.17e-06
DALRD3	-0.23017	1.76e-05
NDUFC1	-0.230739	5.59e-05
ZNF584	-0.230759	2.94e-05
KDELR1	-0.230948	3.94e-07
METTL17	-0.231117	7.82e-05
SMIM20	-0.23158	0.000615309
POP5	-0.231587	0.000164601
NDUFB2	-0.231651	0.000345509
EFCAB7	-0.231805	1.6e-05
C2CD2L	-0.231973	3.8e-05
DNAJC19	-0.232369	3.16e-05
SGF29	-0.232397	2.87e-05
RPP21	-0.232698	0.000233257
IMP3	-0.232765	4.07e-05
ZBTB48	-0.232878	4.24e-05
DGUOK	-0.233464	9.78e-06
IMP4	-0.233661	1.01e-06
COQ10A	-0.233945	0.000239338
YIF1A	-0.23413	0.000358342
PTOV1-AS1	-0.234233	7.88e-06
CNPY2	-0.234308	0.00052331
TXNL4A	-0.234414	3.22e-05
DHRS4L2	-0.234469	0.000296897
DXO	-0.234808	0.000232498
AIP	-0.234814	6.16e-05
LINC00909	-0.235192	2.33e-05
LRWD1	-0.235371	0.00052559
PEX16	-0.235436	7.56e-06
COMMD5	-0.235444	0.000770511
ASH2L	-0.235479	0.000327304
SIRT2	-0.235593	1.61e-05
PICK1	-0.235662	0.000371209
C18orf32	-0.235696	6.48e-05
CYHR1	-0.235736	0.000153386
PET117	-0.236014	0.000162129
DBNDD2	-0.236092	0.00084364
PHOSPHO2	-0.236164	0.000242471
CFAP298	-0.236632	9.12e-06
SMIM8	-0.236876	6.85e-05
PAOX	-0.236891	4.29e-05
AKT1S1	-0.237049	5.05e-06
USF2	-0.237089	2.47e-06
SARNP	-0.237165	0.000164829
SS18L2	-0.237184	5.26e-05
POLR2G	-0.237539	3.12e-05
ZNF205	-0.237575	5.51e-05
C14orf119	-0.237635	0.000309199
TP53I13	-0.237757	0.000180667
NR2C2AP	-0.237768	0.000167305
NPRL2	-0.237861	1.79e-06
SNRNP70	-0.237897	9.06e-05
LAMTOR1	-0.237995	1.93e-05
COA4	-0.238105	0.000204465
PSMB6	-0.238482	0.000125443
CYTH2	-0.238516	2.47e-06
TMUB1	-0.23858	0.000478745
COMMD4	-0.238989	8.17e-06
EPN1	-0.23935	3.64e-06
MPDU1	-0.239417	0.000307035
NDUFAF3	-0.239461	3.41e-05
AC135050.6	-0.239557	0.000868291
TLE5	-0.239573	4.44e-06
ING1	-0.23959	0.000125217
NUBP2	-0.239613	8.67e-05
TAF1C	-0.239617	0.000682526
MRPL55	-0.239664	0.000480782
BBS4	-0.239857	4.12e-05
ARL2	-0.240093	0.000142789
RABEP2	-0.24027	0.000140749
AL096870.2	-0.240339	0.000999302
LRRC45	-0.24047	0.000880775
PIN1	-0.240651	1.37e-06
INCA1	-0.241325	0.000151483
FKBP3	-0.241794	0.000374085
NDUFS3	-0.242236	3.86e-06
OSGEP	-0.242358	6.74e-06
ELOB	-0.242548	0.00090073
MMAB	-0.242603	0.000143086
PIGH	-0.242875	3.51e-06
HINT2	-0.243057	6.34e-05
IFT27	-0.243072	0.000457906
ZNF22	-0.24332	1.25e-05
NFKBIB	-0.243367	0.000110579
CRYBB2P1	-0.243485	0.000478439
INO80C	-0.243546	0.000292689
SMUG1	-0.243847	0.000152793
ACOT8	-0.244032	3.23e-05
NDUFC2	-0.244201	1.38e-05
GCDH	-0.244422	3.73e-07
TRAF3IP2-AS1	-0.244913	3.83e-05
SVBP	-0.244995	0.00031873
C11orf98	-0.245279	0.000487186
ANAPC15	-0.245595	5.72e-05
CLASRP	-0.245872	0.000390946
BANF1	-0.246253	3.25e-05
MFSD10	-0.246521	0.000464428
COMMD1	-0.246554	3.13e-05
BAX	-0.246559	2.84e-06
MAPKAPK5-AS1	-0.247172	1.77e-05
MYDGF	-0.247182	0.000267757
NUCB2	-0.247464	0.000782998
RABL2B	-0.247501	0.000163842
ATP6V1F	-0.247631	0.000229226
CAPN10	-0.248108	0.000395805
ORAI3	-0.248291	0.000254947
MTHFD2L	-0.248598	0.000305151
TBC1D17	-0.248663	3.06e-08
ERCC1	-0.248716	1.22e-06
ATP5MPL	-0.248903	0.000375871
UQCRH	-0.249217	0.000570631
FBXL15	-0.249405	0.000878383
DDT	-0.249864	0.000845796
C11orf49	-0.250234	3.77e-05
HAGH	-0.250616	2.39e-05
SELENOS	-0.250656	4.12e-05
ZBTB42	-0.251007	0.000609748
MRPL11	-0.251125	0.000369048
TUFM	-0.251261	2.97e-07
TMEM219	-0.251374	2.42e-05
UROD	-0.251565	6.11e-06
THAP3	-0.251586	5.54e-06
MUTYH	-0.251638	3.34e-05
PSMB5	-0.251977	0.000200429
C20orf27	-0.252419	0.00012333
CSPP1	-0.252557	0.000377108
POLR2L	-0.253583	0.000372696
DHX34	-0.253702	6.98e-05
NT5C	-0.253883	0.000142464
C14orf93	-0.254593	1.25e-08
MBD3	-0.254772	1.1e-05
ZSWIM3	-0.254989	8.54e-06
RPAIN	-0.255166	4.2e-05
CENPBD1P1	-0.255264	2.22e-09
C19orf12	-0.255533	7.62e-06
DDX39A	-0.255584	0.000109532
NDUFS6	-0.255621	0.000834852
TIMM10	-0.255637	0.000226871
IFT88	-0.256096	6.29e-06
MED11	-0.256218	3.3e-05
PPIB	-0.256479	0.00051522
AL358472.2	-0.256482	0.000382735
POLR2J	-0.256508	0.00024101
C1orf122	-0.256892	6.33e-05
MDM1	-0.256984	0.000269803
NR1H2	-0.257044	3.76e-08
STOML2	-0.257198	0.000211487
AC073896.2	-0.25724	0.000145562
IQCK	-0.25763	0.000243221
TRMT112	-0.257734	2.33e-05
ZBTB45	-0.257803	2.32e-07
C2orf76	-0.257873	0.000211627
PPP1R12C	-0.25811	1.7e-05
PDCD6	-0.25845	0.000164079
P4HTM	-0.258462	2.19e-05
AC009061.2	-0.258497	0.000617695
HEXIM2	-0.258665	1.54e-05
TRMT2A	-0.258676	4.23e-05
POLR1D	-0.258804	2.84e-06
COX17	-0.258873	0.00015187
UXT	-0.259145	4.33e-05
TP53RK	-0.259184	2.16e-06
CHMP2A	-0.259201	1.51e-07
RPLP2	-0.259667	0.000133324
GAS8	-0.259987	8.64e-05
C17orf100	-0.260002	0.00023192
LIN37	-0.260038	3.95e-05
IFTAP	-0.260219	0.000348499
FAM104B	-0.260689	1.6e-05
IFT81	-0.260931	0.000684061
RBM42	-0.261057	3.46e-05
ELOA-AS1	-0.261393	0.000701539
C16orf46	-0.261527	0.000554673
C12orf10	-0.261612	7.9e-07
AURKAIP1	-0.261635	8.34e-05
AC012306.2	-0.261862	7.78e-06
ATP5PO	-0.262085	4.96e-05
CDC14A	-0.262292	0.000893365
TRIM28	-0.262496	6.69e-07
ELP5	-0.26303	1.07e-06
AL162377.1	-0.263358	8.85e-05
RBIS	-0.263441	0.000682361
AC004812.2	-0.263448	0.000192614
PWWP2B	-0.263452	0.000163733
TMEM14B	-0.263458	0.000541258
PLEKHJ1	-0.263487	4.73e-06
NEK8	-0.263502	0.00028632
LSM10	-0.263582	8.14e-06
NT5C3B	-0.263882	6.66e-05
H1-10	-0.264192	1.04e-05
NDUFAF8	-0.264206	8.06e-05
PRORSD1P	-0.264211	0.000873314
MRPL40	-0.265005	1.95e-05
KBTBD3	-0.265096	0.000489771
TCTN1	-0.265332	4.63e-05
DPP7	-0.265837	0.000421554
AC005229.4	-0.266134	0.000125443
RAB4B	-0.266668	1.92e-05
ZNF440	-0.267144	0.000956543
RPS15	-0.267177	0.00073085
NUDT16L1	-0.26722	0.000135571
LAMTOR5	-0.267304	0.000216605
PPP4C	-0.267421	2.63e-06
OCEL1	-0.267437	4.3e-05
CEP89	-0.267595	5.59e-07
RNF181	-0.267622	0.000231147
SH2B1	-0.267634	6.7e-05
PEMT	-0.267642	0.000504985
KLHDC3	-0.267782	1.35e-06
DPY30	-0.268273	1.57e-05
PSMD8	-0.268335	1.07e-05
ARF5	-0.268442	1.16e-05
ATP5F1D	-0.268649	0.00030675
AHCY	-0.268827	0.000320303
RPS19BP1	-0.268829	2.27e-05
RPS28	-0.268863	0.000149915
CIAO2B	-0.268901	4.32e-05
WDR61	-0.268939	1.91e-06
NEDD8	-0.269035	3.98e-06
GEMIN6	-0.269048	1.07e-05
KLHL25	-0.269392	0.000738936
BOLA3	-0.269443	0.00054211
NDUFAB1	-0.269522	5.38e-06
ANKS3	-0.270536	0.000411033
U2AF1L4	-0.270661	0.000351975
CERNA1	-0.270968	0.00084364
RAD9A	-0.271034	5.98e-05
RAB11B-AS1	-0.271238	0.000846506
IQCC	-0.271255	5.06e-05
TMEM208	-0.271284	0.000170907
CAMKMT	-0.271336	3.21e-06
AC012358.3	-0.271432	0.000100584
NDUFV2-AS1	-0.271629	5.11e-05
COX8A	-0.271678	1.2e-05
HAUS1	-0.2717	0.000510112
NUDT22	-0.271842	7.96e-07
FRAT2	-0.272135	0.000351339
NGDN	-0.272269	5.54e-07
AL049796.1	-0.272483	0.000976099
MAGEH1	-0.272559	0.000706756
LINC00476	-0.272646	0.000154438
CCS	-0.273342	2.35e-07
FBXO46	-0.273652	2.08e-06
CRIPT	-0.273866	3.82e-05
PHKG2	-0.274072	1.51e-06
SELENOO	-0.274134	4.19e-05
INAFM1	-0.2745	1.7e-05
DDAH2	-0.274511	0.000108846
ZNF865	-0.274584	7.96e-06
TMEM205	-0.274799	6.75e-06
SCAMP1-AS1	-0.2748	0.000104034
WBP1	-0.275326	3.69e-06
COPE	-0.27545	3.76e-06
MRPS33	-0.275705	6.31e-05
AC008438.1	-0.275712	0.000474771
SNHG8	-0.275905	0.000875121
PPCDC	-0.275905	2.67e-06
LYRM4	-0.275938	0.00016483
PSTK	-0.276145	1.01e-05
LSM2	-0.276326	0.000312774
UBL7	-0.276839	3.31e-08
FDXR	-0.27688	0.000391152
ZNF670	-0.277031	0.000165935
MYPOP	-0.277652	2.42e-07
IRF3	-0.277752	2.17e-08
TARBP2	-0.277865	3.5e-06
MIPEP	-0.278157	2.66e-06
NDUFS5	-0.278182	1.63e-05
ANTKMT	-0.278326	0.000710844
AP001462.1	-0.278723	0.000990765
SMIM19	-0.278893	0.000175925
ATP5PF	-0.27895	1.36e-05
YIF1B	-0.279134	4.93e-06
PRPS2	-0.27952	0.000111243
ALG5	-0.279694	9.33e-05
ZNF513	-0.27988	2.81e-06
KAT8	-0.280187	2e-09
TCEA2	-0.280418	2.39e-05
RHBDD3	-0.280462	1.71e-05
RABGEF1	-0.280629	8.58e-07
COX14	-0.280771	0.000135214
ARL6	-0.281056	4.95e-06
AC022916.2	-0.281167	0.000166116
CCDC121	-0.281196	2.91e-06
ZNF576	-0.281248	2.85e-10
MRPS21	-0.281468	9.18e-05
SDR39U1	-0.281927	1.92e-06
ZNF32	-0.282014	5.87e-05
SELENOH	-0.282081	1.62e-05
TTC30A	-0.282311	0.000189915
POLR2H	-0.282618	1.41e-06
TMEM14C	-0.282648	4.27e-05
UQCR10	-0.28279	2.93e-05
AL139384.1	-0.283295	0.000594927
TMEM234	-0.283331	3.42e-06
EMC1-AS1	-0.283346	0.000214849
ANKRD16	-0.283504	5.6e-07
FAM98C	-0.2839	5.08e-07
USE1	-0.284201	3.56e-07
AC034236.2	-0.28431	0.00084364
DYNLT1	-0.284491	1.49e-05
AC090617.5	-0.284792	1.57e-05
PRR5	-0.284861	0.000100115
TRAPPC2L	-0.284997	1.7e-05
EMC6	-0.28505	0.000298683
C11orf1	-0.285248	0.000444753
TSSK6	-0.286086	0.000128139
RFXANK	-0.286191	3.77e-07
CCDC57	-0.286387	0.00021713
NDUFV2	-0.286437	7.73e-05
IFT22	-0.286812	1.21e-05
AC016027.1	-0.286925	0.000687163
IRAK1BP1	-0.287211	0.000139785
ZNF473	-0.287354	3.17e-07
PTS	-0.287454	2.37e-05
PRAF2	-0.287474	0.00019237
AP1G2	-0.287523	0.000307783
ZNF414	-0.287637	3.31e-07
ARL3	-0.288037	5.04e-07
NSMCE4A	-0.288189	2.82e-08
LRRC27	-0.288231	5.7e-06
SNRPGP2	-0.288392	0.000966503
BBS5	-0.288421	2.28e-06
RDH13	-0.288523	0.00010782
CENPT	-0.288661	7.77e-05
MCRIP1	-0.28883	1.78e-05
SLC1A5	-0.289257	4.54e-05
CCNB1IP1	-0.289298	0.000408698
DGCR6L	-0.289919	1.49e-05
ZNF77	-0.289936	1.84e-06
C18orf21	-0.290028	3.55e-06
KIAA1841	-0.29026	9.73e-05
NIPSNAP2	-0.290389	0.000439441
RPARP-AS1	-0.290429	0.000133726
SMPD4BP	-0.290539	0.000559218
PTDSS2	-0.29172	3.59e-07
STK36	-0.291838	4.46e-05
AC079414.3	-0.291888	0.000547513
TSTA3	-0.291989	0.000533579
SLIRP	-0.292047	6.92e-06
ATP5F1E	-0.292073	1.12e-05
ZHX1-C8orf76	-0.292191	0.000734501
NT5DC2	-0.292209	7.48e-05
ANKRD39	-0.292266	1.05e-07
LSM4	-0.29273	3.64e-06
RPSAP9	-0.293067	0.000236865
RNASEH2C	-0.293104	6.87e-07
TRIM52-AS1	-0.293112	0.000114777
AC139768.1	-0.293175	4.39e-06
MRPL13	-0.293678	0.000382317
PHF5A	-0.293812	1.01e-05
NSD3	-0.294071	1.7e-05
GSTO1	-0.294124	0.000889712
FKBP2	-0.29457	0.000173656
NIFK-AS1	-0.29466	7.04e-10
CRTC1	-0.294673	4.5e-05
HMBS	-0.295041	2.43e-05
RBX1	-0.295417	1.06e-05
ERH	-0.295619	1.76e-06
ARL16	-0.295885	1.09e-05
MRPL54	-0.295937	0.000413489
SLC25A11	-0.296037	3.75e-09
SMYD3	-0.296171	0.000112877
ZNF628	-0.296647	2.39e-06
FUNDC2	-0.296657	2.96e-05
CCNQ	-0.29675	5.43e-05
MAGEF1	-0.296981	3.64e-07
PRPF31	-0.297061	5.94e-14
ACBD4	-0.297091	3.74e-06
SDHAF4	-0.297124	0.000266534
C19orf54	-0.297247	2.03e-08
ZNF709	-0.297367	0.000395805
GOLGA7	-0.297409	1.81e-05
FCGRT	-0.297665	0.000120131
TMEM67	-0.298017	0.000125622
WASH4P	-0.298245	7.36e-05
SDF2L1	-0.298489	0.00026476
COA3	-0.298627	0.0001333
LY6G5C	-0.299375	8.91e-06
DTYMK	-0.299537	0.000104596
ASH1L-AS1	-0.299773	4.58e-05
PPP5C	-0.299797	1.75e-12
BCL7C	-0.299884	9.01e-07
CHCHD1	-0.299893	4.09e-07
ZNF460-AS1	-0.3002	0.000937004
NDUFB6	-0.300367	8.92e-06
ZNF358	-0.300572	1.21e-05
RPS14	-0.300601	0.00080018
AP001160.3	-0.301306	2.24e-06
FAU	-0.301508	2.05e-05
UBE2M	-0.301663	2.5e-09
C19orf53	-0.301917	3.31e-06
AC010326.4	-0.30219	0.000395805
ATP5MD	-0.302204	2.7e-05
AC034236.1	-0.302537	0.000204465
PAGR1	-0.302978	5.55e-07
CHCHD6	-0.302985	1.31e-06
RPGR	-0.303138	7.26e-06
GGT7	-0.30346	0.000203555
CREB3L4	-0.303573	0.000373
YPEL3	-0.30361	2.55e-05
NDUFA4	-0.30361	5.87e-05
MRPL21	-0.303686	2.28e-05
C15orf61	-0.303856	1.92e-07
THEM6	-0.303909	0.000579485
SELENOK	-0.303963	1.2e-06
PYCR3	-0.304104	0.000217763
GNB1L	-0.304127	9.73e-05
ALDH16A1	-0.304225	1.48e-06
PATZ1	-0.304407	4.25e-09
C8orf82	-0.304669	7.07e-05
LRRC61	-0.304732	4.82e-05
TRAPPC2B	-0.305166	4.1e-06
CENPS	-0.30587	5.8e-05
THAP8	-0.306218	2.64e-05
ITPA	-0.30641	2.48e-07
GTF2A2	-0.306548	4.4e-06
SAP30-DT	-0.306604	0.000635856
DNAL1	-0.307163	2.41e-09
AC009831.1	-0.307245	3.6e-06
CGRRF1	-0.307288	8.94e-06
BAD	-0.307656	3.91e-07
NOP53	-0.307857	5.25e-07
FIZ1	-0.308254	3.32e-10
AL691432.2	-0.308294	0.000145021
COA6	-0.308322	0.00063435
MRPL43	-0.308436	4.45e-08
SHLD3	-0.308605	1.07e-05
CETN2	-0.308616	3.45e-06
RPS15A	-0.308801	0.000262941
AC002467.1	-0.308824	0.00017798
MICOS13	-0.308991	7.46e-06
ALDH4A1	-0.309152	3.44e-05
BAG4	-0.309437	4.85e-05
NSUN7	-0.309451	0.000276133
ARL6IP4	-0.309741	0.000511621
DNAJC27-AS1	-0.30976	0.000939255
SARS2	-0.309769	5.36e-05
AC012313.1	-0.309906	6.09e-06
ASPSCR1	-0.309969	0.000238336
AC007383.1	-0.310174	2.62e-06
AL645728.1	-0.310285	4.62e-05
ZNF775	-0.310341	6.09e-08
YDJC	-0.310408	7.12e-05
ANAPC11	-0.310592	3.59e-05
LINC00680	-0.31065	0.000163568
ATP5MF	-0.311376	0.000304436
EAF2	-0.311454	0.000288188
CEBPB-AS1	-0.311494	0.000582503
CENPS-CORT	-0.311866	4.59e-05
FHIT	-0.312177	2.81e-05
AC036176.1	-0.312367	0.000373108
PXN-AS1	-0.312715	1.31e-05
CLCN2	-0.31307	1.66e-05
NDUFB9	-0.313133	0.00026447
RPL27A	-0.313441	0.000120644
TSEN34	-0.313587	2.98e-11
DBIL5P	-0.313929	0.00052722
KHDC1	-0.313943	0.00035693
AC011448.1	-0.313978	0.000144643
PAN3-AS1	-0.314474	0.000358698
AL138762.2	-0.314508	0.000687422
UQCRQ	-0.314813	0.000142464
WDR83	-0.31485	4.09e-11
COX7B	-0.314963	9.05e-05
CYB5D1	-0.315231	9.14e-06
ELF3-AS1	-0.315593	0.000690932
RPS3	-0.315704	0.000394494
MZF1	-0.315745	0.000134029
RSL24D1	-0.315993	0.000179706
MRPL12	-0.316077	0.000171308
MRPL23	-0.316255	1.87e-06
FAM86B3P	-0.316799	0.000437755
EIF3K	-0.316849	6.71e-08
RAB30-DT	-0.317188	4.82e-05
COX4I1	-0.317198	3.4e-06
LENG1	-0.317234	3.59e-12
C11orf71	-0.317235	5.05e-05
EXOSC4	-0.31769	6.75e-05
IPO4	-0.317874	1.18e-05
NUP50-DT	-0.318087	0.000228575
LAMTOR4	-0.318231	8.34e-05
ZNF48	-0.318314	9.94e-09
DCUN1D2	-0.318461	9.8e-07
TMEM143	-0.318565	4.16e-09
AC092718.3	-0.319001	0.000725639
TTC32	-0.319231	5.87e-05
ATP5ME	-0.319309	1.67e-05
MIF	-0.31939	0.000594696
ATP5MG	-0.319437	1.49e-06
PBX4	-0.319571	0.000837947
ZNF747	-0.319653	1.02e-11
MYL5	-0.319881	0.000277463
BICRA	-0.320046	7.53e-07
INO80B	-0.320354	1.38e-07
SSBP4	-0.320444	4.64e-07
CHCHD10	-0.320517	0.000305151
NTHL1	-0.320903	8.61e-05
REX1BD	-0.321278	2.9e-05
NDUFB8	-0.32167	1.23e-08
PPP1R16A	-0.321831	0.000153386
PPOX	-0.321884	6.89e-07
MPST	-0.322064	3.48e-05
SF3B5	-0.322192	2.13e-07
PRANCR	-0.323184	0.000129205
P3H4	-0.323199	0.000939075
SIRT4	-0.323381	4.13e-05
CROCCP2	-0.323721	0.000155395
FAAP20	-0.323943	7.44e-08
NPM3	-0.323977	0.000139657
POP4	-0.323999	2.58e-07
MRPL34	-0.32423	2.06e-06
FBXO16	-0.324271	0.000472086
CYC1	-0.324448	0.000171345
CYBA	-0.324649	0.000726266
WRAP53	-0.324837	1.23e-09
NDUFS8	-0.325104	2.9e-07
C17orf113	-0.325118	0.000683756
UBE3D	-0.325124	1.21e-08
AC011468.5	-0.325528	0.000328816
AC024575.2	-0.325613	0.000104271
RASIP1	-0.325875	0.000865443
GADD45GIP1	-0.326174	8.92e-06
TTC30B	-0.32628	2.76e-07
TBCB	-0.326433	2.01e-07
IFT52	-0.3265	2.26e-09
ARHGEF25	-0.326581	0.000253745
RPL23P2	-0.327158	0.000727377
ROM1	-0.327311	7.81e-05
PARD6A	-0.327604	0.000826019
ZNF552	-0.327792	2.39e-05
AP002990.1	-0.327819	5.9e-08
CST3	-0.327883	0.000267757
VPS13B-DT	-0.328002	0.000401244
DLGAP4-AS1	-0.328056	0.000136793
AC005005.3	-0.328297	0.00069821
SLC25A10	-0.328411	0.000409185
RPS8	-0.328495	3.1e-05
COMMD3	-0.328497	4.54e-08
LOH12CR2	-0.328869	9.24e-05
TMA7	-0.328995	1.05e-06
ALKBH7	-0.329118	8.98e-06
AL354892.2	-0.329159	0.000131119
BBC3	-0.329522	1.06e-05
RPP25L	-0.329537	2.52e-07
PEX11G	-0.330364	1.3e-05
ISG20	-0.330423	0.000693064
RPS29	-0.330677	0.000164932
TTC12	-0.330882	1.54e-06
ZNF296	-0.33095	3.25e-05
ECE2	-0.331572	0.00084144
FRS3	-0.331674	1.59e-06
ZNF497	-0.33196	2.7e-05
SAT2	-0.332143	5.72e-07
RPL18A	-0.332157	0.000202884
WDR90	-0.332586	0.000256387
TMEM9	-0.333213	1.32e-05
ATP6V0E2	-0.333711	6.64e-05
PSMG3	-0.333828	2.96e-05
GSTM4	-0.333901	1.19e-06
AC090515.3	-0.333944	6.87e-05
AC026202.2	-0.334027	0.000801182
CCT2	-0.334263	0.000371635
ZNF837	-0.334327	3.33e-06
SNHG17	-0.334542	4.16e-05
RNF215	-0.335054	5.09e-09
SPPL2B	-0.335131	6.51e-06
ANKRD54	-0.335382	2.11e-11
YAE1	-0.335415	1.71e-07
FBXW9	-0.335508	7.09e-08
FUT1	-0.33558	0.000378076
EMC10	-0.335822	1.11e-08
PRSS36	-0.335855	0.000291933
AC000068.1	-0.335941	8.94e-05
MFSD3	-0.336228	0.00051667
AC244090.1	-0.336288	0.000135068
CYP51A1-AS1	-0.336386	0.00055816
SDHAF3	-0.336495	3.7e-05
SLC46A3	-0.336694	0.00051581
NAPA-AS1	-0.336762	2.92e-06
RPS6	-0.33722	0.000195356
CSKMT	-0.337517	1.55e-05
ZNF524	-0.337567	5.29e-07
PPP1R35	-0.33772	3.93e-05
CDK20	-0.338062	4.62e-07
AL357140.2	-0.33818	9.42e-05
ZNF593	-0.339108	5.44e-06
AC127537.1	-0.339111	0.000220191
ANO7L1	-0.33925	2.73e-05
COQ8B	-0.339625	9.53e-11
MED31	-0.34032	2.27e-06
HSCB	-0.340384	1.36e-07
AC023632.2	-0.340757	0.000589066
NDUFAF5	-0.340975	2.24e-07
RNF208	-0.341466	0.000201528
TIMM13	-0.341706	2.47e-08
ZNF579	-0.341777	2.67e-06
UQCR11	-0.342547	2.3e-07
MTMR9LP	-0.342726	0.000790863
AC025181.2	-0.342757	2.14e-05
HSD11B1L	-0.342836	2.78e-06
AC090517.2	-0.342957	0.000802486
ENDOG	-0.343165	1.62e-06
AC142472.1	-0.343555	8.87e-05
PLXNB1	-0.343737	6.95e-05
TPGS1	-0.343998	0.000283555
MED27	-0.344248	2.05e-07
MAFG-DT	-0.344486	0.000111961
RPS9	-0.3447	4.19e-06
FAM221A	-0.344862	2.39e-05
LNCTAM34A	-0.345024	0.000148859
ATRAID	-0.345109	6.44e-07
ZNHIT1	-0.345148	5.7e-06
AC007114.1	-0.345207	0.000193814
ECH1	-0.345304	1.11e-07
MAGIX	-0.345387	0.000489782
ARHGAP39	-0.345441	0.000125063
COX7A2	-0.345463	2.2e-05
SMDT1	-0.345854	1.6e-07
ZSCAN5A	-0.346328	2.33e-09
IFT140	-0.346369	1.41e-05
NRSN2-AS1	-0.346478	4.96e-06
PCED1A	-0.346634	4.23e-07
MYLK-AS1	-0.346733	0.000496389
GLB1L	-0.346977	1.21e-06
VDAC3	-0.347423	4.63e-06
GTSE1-DT	-0.347605	0.000221653
CHCHD5	-0.347634	6.67e-07
AC133552.2	-0.347666	5.9e-06
TBC1D8	-0.347986	0.000196652
GPR135	-0.348338	3.28e-05
CENPX	-0.348461	7.76e-05
LINC00899	-0.348994	2.08e-05
PTRHD1	-0.349275	7.21e-06
SIGIRR	-0.349362	7.25e-08
KIAA1211L	-0.349902	0.000590251
UQCRFS1	-0.350023	2.35e-07
FAM24B	-0.350167	0.000386819
ECI1	-0.350317	3.5e-07
NCBP2AS2	-0.350906	4.69e-08
RANGRF	-0.351011	1.15e-05
SEMA3F	-0.351015	0.000369318
DMAC1	-0.351439	2.84e-06
NOP53-AS1	-0.351549	0.000643519
MRPL36	-0.351593	7.64e-06
AL035461.3	-0.352081	0.000652872
BLOC1S1	-0.352633	6.89e-07
AC000068.2	-0.353265	0.000148742
CAPN10-DT	-0.353752	6.45e-05
SHBG	-0.354192	0.000269424
LRP3	-0.354609	0.000308125
OST4	-0.354849	2.82e-08
SNHG21	-0.355047	7.26e-06
JOSD2	-0.355061	3.56e-08
LAGE3	-0.355072	1.82e-05
ZNF428	-0.355109	2.02e-08
TIMM50	-0.355169	2.56e-08
HSBP1	-0.355217	2.53e-07
RPL21	-0.355247	1.76e-05
GRTP1	-0.355289	0.000180667
THAP7	-0.355604	1.5e-08
SMIM26	-0.355618	1.02e-08
COMMD7	-0.35591	1.8e-10
PLEKHF1	-0.356029	0.000269169
AC008507.1	-0.356767	0.000125063
AC006252.1	-0.356784	0.000196735
ZDHHC1	-0.357408	1.41e-06
BCAT2	-0.357655	1.31e-08
MZT2B	-0.357891	7.01e-07
COA5	-0.359238	7.67e-12
TMEM223	-0.359308	3.23e-08
AC136475.2	-0.359339	4.17e-05
ILF3-DT	-0.359351	3.43e-09
LMTK3	-0.359452	0.000559941
AP005329.2	-0.359602	0.000106572
AL118558.3	-0.359695	2.08e-05
NPEPL1	-0.359867	0.000121506
AL162231.1	-0.360038	9.01e-06
AC026801.2	-0.360256	0.000136178
SNHG11	-0.360365	3.1e-10
ZNF133	-0.360635	1.13e-10
RPL28	-0.361035	5.14e-07
STK32C	-0.361297	2.79e-06
RPS3A	-0.361547	0.000373377
OXLD1	-0.36169	7.78e-08
SERF2	-0.361998	5.71e-07
AC068338.2	-0.362136	7.8e-07
U47924.2	-0.362548	7.23e-06
TRIT1	-0.362757	7.86e-10
AC011481.2	-0.363087	0.000523498
MRPS15	-0.363104	3.38e-07
UBL5	-0.363272	3.35e-08
SPACA6	-0.363369	9.88e-05
CCDC61	-0.363466	8.84e-11
COMTD1	-0.363485	0.000618615
CC2D2A	-0.3636	9.64e-07
DCTPP1	-0.363645	1.55e-06
ZNF688	-0.364018	3.62e-09
CHKA	-0.364064	1.08e-05
MACROD1	-0.364326	3.68e-05
FUOM	-0.364378	0.000872146
AC009506.2	-0.364405	2.24e-08
AC092117.1	-0.364413	0.000794264
AC124016.2	-0.364728	0.000188747
NXT1	-0.364999	4.07e-06
AP006621.5	-0.365561	0.000988632
PSD	-0.365919	2.39e-05
LCA5L	-0.365972	3.6e-05
FGFBP3	-0.365996	5.31e-05
AL358852.1	-0.366146	0.000122019
SMIM4	-0.36655	2.05e-06
IFT43	-0.366993	1.26e-11
ACYP1	-0.367287	1.08e-06
C15orf56	-0.367431	0.000152648
TMEM107	-0.367618	3.15e-09
MRPL41	-0.36785	3.99e-06
CHEK2	-0.368404	1.8e-05
GTF3A	-0.368588	6.47e-07
PRDX5	-0.368882	7.05e-08
KIF9	-0.368967	1.51e-08
SEMA6C	-0.36965	0.000885692
AL117379.1	-0.369657	0.00058863
CEP83-DT	-0.369684	0.000366283
MYL6B	-0.369733	8.21e-08
EID2B	-0.369876	2.52e-07
GEMIN7-AS1	-0.369941	4.51e-05
TMEM147	-0.369998	1.35e-07
MED25	-0.370062	1.1e-14
RPL21P119	-0.370632	0.000409708
AC099850.2	-0.370688	3.78e-06
PIH1D1	-0.370763	1.25e-18
NDUFB7	-0.370807	1.14e-06
ZNF511	-0.370912	1.86e-08
AL355297.3	-0.371239	0.000485423
LENG9	-0.37185	3.66e-06
QPCTL	-0.371919	5.53e-09
AC234582.1	-0.372153	0.000727377
SMPD2	-0.372307	2.04e-11
PDCD5	-0.372417	7.79e-08
BRF2	-0.373121	7.99e-07
AC100810.1	-0.373143	1.08e-07
PNKP	-0.373203	8.63e-14
LSM7	-0.37323	8.9e-09
PRMT1	-0.373454	7.67e-14
AF001548.2	-0.373628	0.000295219
ATP5IF1	-0.373691	5.75e-10
C2orf15	-0.373695	3.11e-06
ZSCAN16-AS1	-0.374064	1.28e-05
H2AJ	-0.374189	1.89e-05
PDCD2L	-0.374207	7.6e-07
RPS3AP20	-0.374251	0.000662452
ZNF444	-0.37432	7.5e-10
ARVCF	-0.374463	6.13e-05
PDRG1	-0.374899	2.19e-10
AC006449.7	-0.37518	2.17e-08
OSER1-DT	-0.375189	4.82e-07
TCTEX1D2	-0.375889	0.000293289
WEE2-AS1	-0.376371	6.63e-05
TMEM198	-0.376574	0.000806155
RAB3IP	-0.377714	0.000184895
AC046134.2	-0.377765	7.32e-06
CROCC	-0.378262	4.24e-06
POLE2	-0.378374	0.000269301
ZFAS1	-0.378757	0.000157438
AC079447.1	-0.379041	3.69e-06
MRPL52	-0.379175	3.74e-08
NRAV	-0.379402	2.38e-10
NDUFB1	-0.379539	1.67e-07
CHADL	-0.379697	0.000420703
LINC00653	-0.379699	0.000581961
CCDC167	-0.380105	2.84e-06
DPCD	-0.380226	5.75e-10
SNRPG	-0.380521	5.49e-06
IRF2BP1	-0.380767	8.78e-12
COX6A1	-0.381032	2.54e-07
ZBTB12	-0.381042	9.52e-06
ZFHX2	-0.38119	0.000420703
[truncated: 1,912 more rows]
