# Supplementary material for: Pan-cancer investigation reveals mechanistic insights of planar cell polarity gene Fuz in carcinogenesis
Source: Aging (Albany NY). 2021 Feb 26;13(5):7259–83. doi: 10.18632/aging.202582 (PMC7993721; doi:10.18632/aging.202582)
Supplement: Supplementary File 2 [file aging-13-202582-s004.xlsx]

## Sheet: Sheet1
Supplementary File 2. The alterations of Fuz promoter methylation in different types of cancer.
Cancer type	Meth_Probe	Gene	Chrom	Position	Corr_Coeff	Pval	Qval	Expr_Mean	Meth_Mean
Rectum adenocarcinoma (READ)	cg21712019	FUZ	19	50316342	-0.7901	0	0	6.298	0.353585
Stomach adenocarcinoma (STAD)	cg11398523	FUZ	19	50316423	-0.7896	0	0	6.62838	0.303882
Colon adenocarcinoma (COAD)	cg11398523	FUZ	19	50316423	-0.7869	0	0	6.2649	0.34781
Stomach and esophageal carcinoma (STES)	cg11398523	FUZ	19	50316423	-0.7562	0	0	6.52318	0.281016
Liver hepatocellular carcinoma (LIHC)	cg11398523	FUZ	19	50316423	-0.7346	0	0	6.92572	0.29663
Esophageal carcinoma (ESCA)	cg11398523	FUZ	19	50316423	-0.728793	0	0	6.31048	0.234787
Head and neck squamous cell carcinoma (HNSC)	cg11398523	FUZ	19	50316423	-0.6798	9.129e-72	4.22e-72	6.79455	0.169851
Cervical squamous cell carcinoma and endocervical adenocarcinoma (CESC)	cg11398523	FUZ	19	50316423	-0.338701	1.717e-09	3.821e-10	7.94	0.092164
Thymoma (THYM)	cg11398523	FUZ	19	50316423	-0.2319	0.01096	0.001544	9.1401	0.019773
Uterine corpus endometrial carcinoma (UCEC)	cg22708738	FUZ	19	50316212	-0.5738	0	0	8.953	0.22374
Bladder urothelial carcinoma (BLCA)	cg22708738	FUZ	19	50316212	-0.5189	0	0	8.14045	0.28151
Lung squamous cell carcinoma (LUSC)	cg22708738	FUZ	19	50316212	-0.4832	0	0	7.70421	0.239663
Lung adenocarcinoma (LUAD)	cg22708738	FUZ	19	50316212	-0.4107	0	0	7.90591	0.40899
Breast invasive carcinoma (BRCA)	cg22708738	FUZ	19	50316212	-0.41	0	0	8.2	0.212824
Sarcoma (SARC)	cg22708738	FUZ	19	50316212	-0.3789	3.957e-10	9.453e-11	8.47477	0.193306
Prostate adenocarcinoma (PRAD)	cg22708738	FUZ	19	50316212	-0.3709	1.293e-19	2.248e-20	8.52488	0.306053
Skin cutaneous melanoma (SKCM)	cg22708738	FUZ	19	50316212	-0.289649	1.851e-08	2.401e-09	8.69035	0.158354
Kidney renal papillary cell carcinoma (KIRP)	cg22708738	FUZ	19	50316212	-0.2401	6.224e-05	6.569e-06	9.18225	0.18118
Pancreatic adenocarcinoma (PAAD)	cg10290724	FUZ	19	50312544	-0.3104	2.726e-05	4.585e-06	8.23212	0.08063
Kidney renal clear cell carcinoma (KIRC)	cg10290724	FUZ	19	50312544	-0.238301	1.849e-05	2.524e-06	8.785	0.072555
Thyroid carcinoma (THCA)	cg26271127	FUZ	19	50312505	-0.2103	2.169e-06	3.914e-07	8.89382	0.051064
