# Supplementary material for: Pan-cancer investigation reveals mechanistic insights of planar cell polarity gene Fuz in carcinogenesis
Source: publisher site journal article supplement (doi:10.18632/aging.202582), 2021-02-26
Supplement: Supplementary file [file aging-v13i5-202582-supplementary-material-SD2.pdf]

**SUPPLEMENTARY TABLES**

**Supplementary Table 1. Multivariate analysis of correlation of different disease parameters in BRCA, ESCA, HNSC, KIRC, KIRP, LIHC, LUAD or STAD patients.**

| Parameter         | Multivariate analysis BRCA |                 |          | Multivariate analysis ESCA |                 |         |
|-------------------|----------------------------|-----------------|----------|----------------------------|-----------------|---------|
|                   | HR                         | 95% CI          | p value  | HR                         | 95% CI          | p value |
| Gender            | 0.9537                     | 0.1292 - 7.042  | 0.9630   | 1.247                      | 0.0927 - 16.766 | 0.8679  |
| Race              | 0.893                      | 0.6298 - 1.266  | 0.5250   | 0.725                      | 0.3132 - 1.678  | 0.45264 |
| Ethnicity         | 5.8278                     | 0.8107 - 41.895 | 0.0799   | 1.469                      | 0.1216 - 17.765 | 0.76212 |
| Primary diagnosis | 0.7095                     | 0.5378 - 0.936  | 0.0152   | 1.904                      | 0.6730 - 5.384  | 0.22494 |
| Tumor stage       | 1.2114                     | 1.1428 - 1.284  | 1.10E-10 | 1.525                      | 1.1233 - 2.071  | 0.00682 |
| Age at diagnosis  | 1.0001                     | 1.0001 - 1.000  | 1.28E-08 | 1.000                      | 0.9999 - 1.000  | 0.40249 |
| Fuz level         | 0.9996                     | 0.9993 - 1.000  | 0.0106   | 0.998                      | 0.9957 - 1.000  | 0.09167 |

  

| Parameter         | Multivariate analysis HNSC |                |          | Multivariate analysis KIRC |                 |          |
|-------------------|----------------------------|----------------|----------|----------------------------|-----------------|----------|
|                   | HR                         | 95% CI         | p value  | HR                         | 95% CI          | p value  |
| Gender            | 0.8247                     | 0.5842 - 1.164 | 0.27342  | 0.9170                     | 0.6353 - 1.324  | 0.64357  |
| Race              | 0.8430                     | 0.6128 - 1.160 | 0.29424  | 0.9811                     | 0.5549 - 1.735  | 0.94774  |
| Ethnicity         | 0.9505                     | 0.4698 - 1.923 | 0.88771  | 4.8638                     | 1.5412 - 15.350 | 0.00698  |
| Primary diagnosis | 0.9786                     | 0.9571 - 1.001 | 0.05591  | N/A                        | N/A             | N/A      |
| Tumor stage       | 1.5944                     | 1.3186 - 1.928 | 1.48E-06 | 1.8836                     | 1.6176 - 2.193  | 3.56E-16 |
| Age at diagnosis  | 1.0001                     | 1.0000 - 1.000 | 0.00296  | 1.0001                     | 1.0000 - 1.000  | 0.00224  |
| Fuz level         | 0.9995                     | 0.9989 - 1.000 | 0.10457  | 1.0000                     | 0.9997 - 1.000  | 0.93238  |

  

| Parameter         | Multivariate analysis KIRP |                 |          | Multivariate analysis LIHC |                |          |
|-------------------|----------------------------|-----------------|----------|----------------------------|----------------|----------|
|                   | HR                         | 95% CI          | p value  | HR                         | 95% CI         | p value  |
| Gender            | 0.798                      | 0.3419 - 1.863  | 0.60189  | 0.8888                     | 0.5772 - 1.369 | 0.593    |
| Race              | 0.805                      | 0.3225 - 2.010  | 0.64221  | 0.9669                     | 0.7706 - 1.213 | 0.771    |
| Ethnicity         | 2.1369                     | 0.2799 - 16.317 | 0.46407  | 1.2104                     | 0.4700 - 3.117 | 0.692    |
| Primary diagnosis | N/A                        | N/A             | N/A      | N/A                        | N/A            | N/A      |
| Tumor stage       | 2.9383                     | 2.0429 - 4.226  | 6.18E-09 | 1.2998                     | 1.1749 - 1.438 | 3.64E-07 |
| Age at diagnosis  | 1.0001                     | 1.0000 - 1.000  | 0.06171  | 1.0000                     | 1.0000 - 1.000 | 0.369    |
| Fuz level         | 0.9988                     | 0.9981 - 1.000  | 0.00241  | 1.0001                     | 0.9994 - 1.001 | 0.825    |

  

| Parameter         | Multivariate analysis LUAD |                |          | Multivariate analysis STAD |                |          |
|-------------------|----------------------------|----------------|----------|----------------------------|----------------|----------|
|                   | HR                         | 95% CI         | p value  | HR                         | 95% CI         | p value  |
| Gender            | 0.9682                     | 0.6656 - 1.408 | 0.866    | 1.071                      | 0.6869 - 1.670 | 0.76191  |
| Race              | 1.2936                     | 0.8047 - 2.080 | 0.288    | 1.052                      | 0.8713 - 1.270 | 0.59922  |
| Ethnicity         | 1.1651                     | 0.2779 - 4.885 | 0.834    | N/A                        | N/A            | N/A      |
| Primary diagnosis | 0.9688                     | 0.8138 - 1.153 | 0.721    | 9.533                      | 0.7760 - 1.171 | 0.64897  |
| Tumor stage       | 1.2151                     | 1.1197 - 1.319 | 3.04E-06 | 1.181                      | 1.0738 - 1.300 | 6.24E-04 |
| Age at diagnosis  | 1.0000                     | 1.0000 - 1.000 | 0.414    | 1.000                      | 1.0000 - 1.000 | 0.02021  |
| Fuz level         | 1.0001                     | 0.9996 - 1.001 | 0.593    | 1.001                      | 1.0002 - 1.001 | 0.00257  |

**Supplementary Table 2. The detailed number of cases with *Fuz* genomic alterations in different types of cancer.**

| Cancer types                          | Total cases | Altered cases |               |               |                      |           |
|---------------------------------------|-------------|---------------|---------------|---------------|----------------------|-----------|
|                                       |             | Mutation      | Amplification | Deep deletion | Multiple alterations | Fusion    |
| Endometrial Carcinoma                 | 586         | 14<br>(2.39%) | 8 (1.37%)     | 1 (0.17%)     | 0                    | 0         |
| Adrenocortical Carcinoma              | 91          | 0             | 3 (3.3%)      | 0             | 0                    | 0         |
| Cholangiocarcinoma                    | 36          | 1 (2.78%)     | 0             | 0             | 0                    | 0         |
| Bladder Urothelial Carcinoma          | 411         | 5 (1.22%)     | 5 (1.22%)     | 0             | 0                    | 0         |
| Mature B-Cell Neoplasms               | 48          | 0             | 0             | 1 (2.08%)     | 0                    | 0         |
| Pancreatic Adenocarcinoma             | 184         | 1 (0.54%)     | 2 (1.09%)     | 0             | 0                    | 0         |
| Diffuse Glioma                        | 513         | 0             | 0             | 8 (1.56%)     | 0                    | 0         |
| Invasive Breast Carcinoma             | 1084        | 0             | 13 (1.2%)     | 1 (0.09%)     | 1 (0.09%)            | 0         |
| Cervical Squamous Cell Carcinoma      | 251         | 1 (0.4%)      | 2 (0.8%)      | 0             | 0                    | 0         |
| Esophagogastric Adenocarcinoma        | 514         | 3 (0.58%)     | 3 (0.58%)     | 0             | 0                    | 0         |
| Non-Seminomatous Germ Cell Tumor      | 86          | 1 (1.16%)     | 0             | 0             | 0                    | 0         |
| Colorectal Adenocarcinoma             | 594         | 5 (0.84%)     | 0             | 0             | 0                    | 0         |
| Thymic Epithelial Tumor               | 123         | 0             | 0             | 1 (0.81%)     | 0                    | 0         |
| Prostate Adenocarcinoma               | 494         | 1 (0.2%)      | 1 (0.2%)      | 2 (0.4%)      | 0                    | 0         |
| Sarcoma                               | 255         | 1 (0.39%)     | 0             | 1 (0.39%)     | 0                    | 0         |
| Melanoma                              | 444         | 3 (0.68%)     | 0             | 0             | 0                    | 0         |
| Non-Small Cell Lung Cancer            | 1053        | 4 (0.38%)     | 2 (0.19%)     | 0             | 0                    | 0         |
| Ovarian Epithelial Tumor              | 584         | 1 (0.17%)     | 2 (0.34%)     | 0             | 0                    | 0         |
| Head and Neck Squamous Cell Carcinoma | 523         | 1 (0.19%)     | 1 (0.19%)     | 0             | 0                    | 0         |
| Glioblastoma                          | 592         | 0             | 1 (0.17%)     | 0             | 0                    | 1 (0.17%) |
| Hepatocellular Carcinoma              | 369         | 0             | 1 (0.27%)     | 0             | 0                    | 0         |
| Renal Clear Cell Carcinoma            | 511         | 0             | 0             | 1 (0.2%)      | 0                    | 0         |
